# Supplementary material for: Identification of Gene Expression Changes Associated With Uterine Receptivity in Mice
Source: Front Physiol. 2019 Feb 14;10:125. doi: 10.3389/fphys.2019.00125 (PMC6413723; doi:10.3389/fphys.2019.00125)
Supplement: Supplementary file 2 [file Table_2.XLSX]

## Sheet: Supplementary Table 2
Supplementary Table 2. The complete list of differentially expressed genes between receptive endometrium and non-receptive endometrium (fold change > 2 and P < 0.05).
Gene	Non-receptive (averaged)	Receptive (averaged)	Fold (Receptive/Non-receptive)	P-value	Gene ID	Description
Dbil5	0	1.75911	100	0.0107093	ENSMUSG00000038057	diazepam binding inhibitor-like 5 [Source:MGI Symbol;Acc:MGI:108039]
Kiss1	0	2.23545	100	0.0107092	ENSMUSG00000102367	KiSS-1 metastasis-suppressor [Source:MGI Symbol;Acc:MGI:2663985]
Adam8	0.000134203	5.87763	100	0.000945166	ENSMUSG00000025473	a disintegrin and metallopeptidase domain 8 [Source:MGI Symbol;Acc:MGI:107825]
Tmsb15a	0	16.6553	100	0.000242333	ENSMUSG00000060726	thymosin beta 15a [Source:MGI Symbol;Acc:MGI:1925728]
Atp6v0d2	0.469898	32.601	69.3789	0.0266069	ENSMUSG00000028238	ATPase, H+ transporting, lysosomal V0 subunit D2 [Source:MGI Symbol;Acc:MGI:1924415]
Guca2b	1.25928	39.3074	31.2142	0.0109379	ENSMUSG00000032978	guanylate cyclase activator 2b (retina) [Source:MGI Symbol;Acc:MGI:1270851]
Obp2a	0.122447	3.33228	27.2141	0.038884	ENSMUSG00000062061	odorant binding protein 2A [Source:MGI Symbol;Acc:MGI:2387617]
8430408G22Rik	3.04497	65.2158	21.4175	0.044313	ENSMUSG00000048489	RIKEN cDNA 8430408G22 gene [Source:MGI Symbol;Acc:MGI:1918730]
Cyp26a1	3.88256	80.5662	20.7508	0.0182849	ENSMUSG00000024987	cytochrome P450, family 26, subfamily a, polypeptide 1 [Source:MGI Symbol;Acc:MGI:1096359]
Lypd1	0.10648	2.17488	20.4253	0.0401464	ENSMUSG00000026344	Ly6/Plaur domain containing 1 [Source:MGI Symbol;Acc:MGI:1919835]
Sowaha	0.0729923	1.39818	19.1551	0.00589826	ENSMUSG00000044352	sosondowah ankyrin repeat domain family member A [Source:MGI Symbol;Acc:MGI:2687280]
Rwdd2a	0.186457	3.34228	17.9252	0.00815938	ENSMUSG00000032417	RWD domain containing 2A [Source:MGI Symbol;Acc:MGI:1916769]
Sectm1b	1.09634	19.174	17.489	0.0284228	ENSMUSG00000039364	secreted and transmembrane 1B [Source:MGI Symbol;Acc:MGI:1929083]
BC030870	0.246605	3.97522	16.1198	0.0377297	ENSMUSG00000074300	cDNA sequence BC030870 [Source:MGI Symbol;Acc:MGI:3039572]
Slc46a2	0.47671	7.63619	16.0185	0.00469893	ENSMUSG00000028386	solute carrier family 46, member 2 [Source:MGI Symbol;Acc:MGI:1353616]
A630023A22Rik	0.107427	1.67925	15.6315	0.0237589	ENSMUSG00000095493	RIKEN cDNA A630023A22 gene [Source:MGI Symbol;Acc:MGI:2145657]
Hal	0.197601	2.76952	14.0157	0.0347163	ENSMUSG00000020017	histidine ammonia lyase [Source:MGI Symbol;Acc:MGI:96010]
Sdr16c6	0.38948	5.35298	13.7439	0.00161724	ENSMUSG00000071019	short chain dehydrogenase/reductase family 16C, member 6 [Source:MGI Symbol;Acc:MGI:2685269]
Il20ra	0.121362	1.66233	13.6973	0.000103122	ENSMUSG00000020007	interleukin 20 receptor, alpha [Source:MGI Symbol;Acc:MGI:3605069]
Fasl	0.248623	3.38939	13.6327	0.0312152	ENSMUSG00000000817	Fas ligand (TNF superfamily, member 6) [Source:MGI Symbol;Acc:MGI:99255]
C2cd4d	0.0935713	1.19638	12.7857	0.00585821	ENSMUSG00000091648	C2 calcium-dependent domain containing 4D [Source:MGI Symbol;Acc:MGI:2685505]
Lrat	0.47371	5.18174	10.9386	0.0198376	ENSMUSG00000028003	lecithin-retinol acyltransferase (phosphatidylcholine-retinol-O-acyltransferase) [Source:MGI Symbol;Acc:MGI:1891259]
Apela	0.763013	8.23586	10.7939	0.00397607	ENSMUSG00000079042	apelin receptor early endogenous ligand [Source:MGI Symbol;Acc:MGI:3642370]
Rnf186	0.378847	3.87196	10.2204	0.0464813	ENSMUSG00000070661	ring finger protein 186 [Source:MGI Symbol;Acc:MGI:1914075]
Aqp8	1.45589	14.6342	10.0517	0.0164723	ENSMUSG00000030762	aquaporin 8 [Source:MGI Symbol;Acc:MGI:1195271]
Inmt	17.8547	173.135	9.69693	0.0240402	ENSMUSG00000003477	indolethylamine N-methyltransferase [Source:MGI Symbol;Acc:MGI:102963]
4932414N04Rik	0.165772	1.58708	9.57386	0.0393251	ENSMUSG00000079324	RIKEN cDNA 4932414N04 gene [Source:MGI Symbol;Acc:MGI:1922971]
Sval2	0.82349	7.80171	9.47396	0.00889888	ENSMUSG00000014104	seminal vesicle antigen-like 2 [Source:MGI Symbol;Acc:MGI:1934254]
Serpina3n	5.40661	44.7555	8.27792	0.00560175	ENSMUSG00000021091	serine (or cysteine) peptidase inhibitor, clade A, member 3N [Source:MGI Symbol;Acc:MGI:105045]
Cwh43	4.56661	36.9515	8.09166	0.00686011	ENSMUSG00000029154	cell wall biogenesis 43 C-terminal homolog [Source:MGI Symbol;Acc:MGI:2444131]
Ccdc152	0.175205	1.40693	8.03019	0.0272025	ENSMUSG00000091119	coiled-coil domain containing 152 [Source:MGI Symbol;Acc:MGI:3641617]
Fabp4	0.238188	1.91269	8.03018	0.0272027	ENSMUSG00000062515	fatty acid binding protein 4, adipocyte [Source:MGI Symbol;Acc:MGI:88038]
Mog	0.126446	1.00623	7.95778	0.0317953	ENSMUSG00000076439	myelin oligodendrocyte glycoprotein [Source:MGI Symbol;Acc:MGI:97435]
Ggh	16.7085	130.121	7.7877	0.00907089	ENSMUSG00000073987	gamma-glutamyl hydrolase [Source:MGI Symbol;Acc:MGI:1329035]
Leap2	0.425587	3.30366	7.7626	0.0400177	ENSMUSG00000036216	liver-expressed antimicrobial peptide 2 [Source:MGI Symbol;Acc:MGI:2672795]
Tac2	2.19262	15.9849	7.29032	0.0155191	ENSMUSG00000025400	tachykinin 2 [Source:MGI Symbol;Acc:MGI:98476]
Chil1	0.321801	2.32041	7.21069	0.00128143	ENSMUSG00000064246	chitinase-like 1 [Source:MGI Symbol;Acc:MGI:1340899]
Ccl8	42.1931	288.066	6.82732	0.0221761	ENSMUSG00000009185	chemokine (C-C motif) ligand 8 [Source:MGI Symbol;Acc:MGI:101878]
Gzma	1.3	8.74359	6.72586	0.033828	ENSMUSG00000023132	granzyme A [Source:MGI Symbol;Acc:MGI:109266]
3110079O15Rik	0.48338	3.24103	6.70493	0.034486	ENSMUSG00000026258	RIKEN cDNA 3110079O15 gene [Source:MGI Symbol;Acc:MGI:1920484]
Tmem213	16.7141	110.947	6.63795	0.0377728	ENSMUSG00000029829	transmembrane protein 213 [Source:MGI Symbol;Acc:MGI:1924772]
Cd200r4	0.266136	1.7628	6.6237	0.000848041	ENSMUSG00000062082	CD200 receptor 4 [Source:MGI Symbol;Acc:MGI:3036289]
Klra1	0.246812	1.61021	6.52404	0.0402844	ENSMUSG00000079853	killer cell lectin-like receptor, subfamily A, member 1 [Source:MGI Symbol;Acc:MGI:101907]
Tm4sf4	1.47792	9.62821	6.51469	0.0420654	ENSMUSG00000027801	transmembrane 4 superfamily member 4 [Source:MGI Symbol;Acc:MGI:2385173]
Gpr174	0.186208	1.20436	6.46782	0.00280561	ENSMUSG00000073008	G protein-coupled receptor 174 [Source:MGI Symbol;Acc:MGI:2685222]
Arhgef37	0.579412	3.62118	6.24975	0.00595658	ENSMUSG00000045094	Rho guanine nucleotide exchange factor (GEF) 37 [Source:MGI Symbol;Acc:MGI:3045339]
Omd	0.295609	1.80869	6.11851	0.00282116	ENSMUSG00000048368	osteomodulin [Source:MGI Symbol;Acc:MGI:1350918]
Syt6	0.431023	2.616	6.06928	0.0117559	ENSMUSG00000027849	synaptotagmin VI [Source:MGI Symbol;Acc:MGI:1859544]
Slc5a8	0.572326	3.46927	6.0617	0.0315785	ENSMUSG00000020062	solute carrier family 5 (iodide transporter), member 8 [Source:MGI Symbol;Acc:MGI:2384916]
4930447C04Rik	0.222796	1.33101	5.97411	0.0412893	ENSMUSG00000021098	RIKEN cDNA 4930447C04 gene [Source:MGI Symbol;Acc:MGI:1923051]
Slc39a8	8.36498	48.9889	5.85642	0.0101237	ENSMUSG00000053897	solute carrier family 39 (metal ion transporter), member 8 [Source:MGI Symbol;Acc:MGI:1914797]
Tll1	1.29603	7.54467	5.82139	0.0484964	ENSMUSG00000053626	tolloid-like [Source:MGI Symbol;Acc:MGI:106923]
Klra7	2.69882	15.2356	5.64527	0.0110606	ENSMUSG00000067599	killer cell lectin-like receptor, subfamily A, member 7 [Source:MGI Symbol;Acc:MGI:101901]
Gzmd	0.571321	3.18243	5.57031	0.0152551	ENSMUSG00000059256	granzyme D [Source:MGI Symbol;Acc:MGI:109255]
Entpd3	1.56331	8.70343	5.5673	0.00040048	ENSMUSG00000041608	ectonucleoside triphosphate diphosphohydrolase 3 [Source:MGI Symbol;Acc:MGI:1321386]
Igfbp3	44.4179	246.687	5.55377	0.040091	ENSMUSG00000020427	insulin-like growth factor binding protein 3 [Source:MGI Symbol;Acc:MGI:96438]
Efhd1	2.89065	15.761	5.4524	0.0312985	ENSMUSG00000026255	EF hand domain containing 1 [Source:MGI Symbol;Acc:MGI:1921607]
Agr2	7.99247	42.3731	5.30163	0.0277251	ENSMUSG00000020581	anterior gradient 2 [Source:MGI Symbol;Acc:MGI:1344405]
Lgr5	0.696955	3.63719	5.21869	0.000254423	ENSMUSG00000020140	leucine rich repeat containing G protein coupled receptor 5 [Source:MGI Symbol;Acc:MGI:1341817]
Klra4	2.47403	12.8378	5.18903	0.00956232	ENSMUSG00000079852	killer cell lectin-like receptor, subfamily A, member 4 [Source:MGI Symbol;Acc:MGI:101904]
Car12	10.9088	55.8523	5.11994	0.00740404	ENSMUSG00000032373	carbonic anhydrase 12 [Source:MGI Symbol;Acc:MGI:1923709]
A530099J19Rik	0.315499	1.61467	5.11783	0.00638088	ENSMUSG00000047462	RIKEN cDNA A530099J19 gene [Source:MGI Symbol;Acc:MGI:2441809]
Hpx	1.23794	6.25905	5.05604	0.0147728	ENSMUSG00000030895	hemopexin [Source:MGI Symbol;Acc:MGI:105112]
Klrd1	1.96	9.43214	4.81232	0.00452132	ENSMUSG00000030165	killer cell lectin-like receptor, subfamily D, member 1 [Source:MGI Symbol;Acc:MGI:1196275]
Trpv6	4.40839	21.014	4.76682	0.0345019	ENSMUSG00000029868	transient receptor potential cation channel, subfamily V, member 6 [Source:MGI Symbol;Acc:MGI:1927259]
Gzme	0.593178	2.81046	4.73798	0.0316388	ENSMUSG00000022156	granzyme E [Source:MGI Symbol;Acc:MGI:109265]
Trpc2	0.378309	1.78284	4.71266	0.0370291	ENSMUSG00000100254	transient receptor potential cation channel, subfamily C, member 2 [Source:MGI Symbol;Acc:MGI:109527]
Syt4	0.385569	1.77212	4.59613	0.0472541	ENSMUSG00000024261	synaptotagmin IV [Source:MGI Symbol;Acc:MGI:101759]
Rdh12	1.3979	6.28538	4.49629	0.000808578	ENSMUSG00000021123	retinol dehydrogenase 12 [Source:MGI Symbol;Acc:MGI:1925224]
Klra10	0.547477	2.46026	4.49381	0.0143473	ENSMUSG00000072718	killer cell lectin-like receptor subfamily A, member 10 [Source:MGI Symbol;Acc:MGI:1321093]
Samd3	1.41103	6.31108	4.47267	0.0126204	ENSMUSG00000051354	sterile alpha motif domain containing 3 [Source:MGI Symbol;Acc:MGI:2685469]
Nkg7	5.33069	23.7061	4.4471	0.00156737	ENSMUSG00000004612	natural killer cell group 7 sequence [Source:MGI Symbol;Acc:MGI:1931250]
Clnk	0.626724	2.78317	4.44082	0.0472875	ENSMUSG00000039315	cytokine-dependent hematopoietic cell linker [Source:MGI Symbol;Acc:MGI:1351468]
Cldn10	36.6146	160.73	4.38979	0.0096122	ENSMUSG00000022132	claudin 10 [Source:MGI Symbol;Acc:MGI:1913101]
Abca6	3.43155	14.9053	4.3436	0.0113373	ENSMUSG00000044749	ATP-binding cassette, sub-family A (ABC1), member 6 [Source:MGI Symbol;Acc:MGI:1923434]
Gkn3	1.29099	5.54068	4.29179	0.0496897	ENSMUSG00000030048	gastrokine 3 [Source:MGI Symbol;Acc:MGI:1916138]
Klrk1	2.39236	10.2441	4.28201	0.0148799	ENSMUSG00000030149	killer cell lectin-like receptor subfamily K, member 1 [Source:MGI Symbol;Acc:MGI:1196250]
Gadd45a	21.8589	92.5403	4.23352	0.000568193	ENSMUSG00000036390	growth arrest and DNA-damage-inducible 45 alpha [Source:MGI Symbol;Acc:MGI:107799]
Clec4a3	3.01638	12.5879	4.17318	0.000341785	ENSMUSG00000043832	C-type lectin domain family 4, member a3 [Source:MGI Symbol;Acc:MGI:1920399]
Klre1	2.2449	9.32818	4.15527	0.0338106	ENSMUSG00000050241	killer cell lectin-like receptor family E member 1 [Source:MGI Symbol;Acc:MGI:2662547]
Ctla2b	211.103	860.426	4.07585	0.0184718	ENSMUSG00000074874	cytotoxic T lymphocyte-associated protein 2 beta [Source:MGI Symbol;Acc:MGI:88555]
Clca1	5.69123	23.1898	4.07466	0.0248357	ENSMUSG00000028255	chloride channel accessory 1 [Source:MGI Symbol;Acc:MGI:1346342]
Prss22	0.687044	2.79451	4.06744	0.0440447	ENSMUSG00000045027	protease, serine 22 [Source:MGI Symbol;Acc:MGI:1918085]
Gm14295	0.665218	2.69526	4.0517	0.0288121	ENSMUSG00000078877	predicted gene 14295 [Source:MGI Symbol;Acc:MGI:3709624]
Oip5	0.498299	2.01846	4.0507	0.0408586	ENSMUSG00000072980	Opa interacting protein 5 [Source:MGI Symbol;Acc:MGI:1917895]
Apol7e	0.333189	1.34686	4.04232	0.00790311	ENSMUSG00000071716	apolipoprotein L 7e [Source:MGI Symbol;Acc:MGI:3704456]
Ncr1	4.35383	17.3317	3.9808	0.0250193	ENSMUSG00000062524	natural cytotoxicity triggering receptor 1 [Source:MGI Symbol;Acc:MGI:1336212]
Gcsam	0.636921	2.5139	3.94696	0.0302741	ENSMUSG00000022659	germinal center associated, signaling and motility [Source:MGI Symbol;Acc:MGI:102969]
Tlr4	4.01864	15.691	3.90456	0.0168542	ENSMUSG00000039005	toll-like receptor 4 [Source:MGI Symbol;Acc:MGI:96824]
Kng2	0.702936	2.69786	3.83799	0.00818622	ENSMUSG00000060459	kininogen 2 [Source:MGI Symbol;Acc:MGI:3027157]
Eya1	0.358987	1.3568	3.77952	0.0482913	ENSMUSG00000025932	EYA transcriptional coactivator and phosphatase 1 [Source:MGI Symbol;Acc:MGI:109344]
Cd55	16.5004	62.2988	3.77558	0.0025785	ENSMUSG00000026399	CD55 molecule, decay accelerating factor for complement [Source:MGI Symbol;Acc:MGI:104850]
Fxyd3	93.3245	351.583	3.76732	0.0269825	ENSMUSG00000057092	FXYD domain-containing ion transport regulator 3 [Source:MGI Symbol;Acc:MGI:107497]
Il4i1	0.836949	3.08532	3.68639	0.0235583	ENSMUSG00000074141	interleukin 4 induced 1 [Source:MGI Symbol;Acc:MGI:109552]
1500015O10Rik	4.5282	16.6499	3.67693	0.00591184	ENSMUSG00000026051	RIKEN cDNA 1500015O10 gene [Source:MGI Symbol;Acc:MGI:1926146]
Adam28	0.901289	3.30544	3.66746	0.000266841	ENSMUSG00000014725	a disintegrin and metallopeptidase domain 28 [Source:MGI Symbol;Acc:MGI:105988]
A630001G21Rik	0.987793	3.59009	3.63445	0.010681	ENSMUSG00000052760	RIKEN cDNA A630001G21 gene [Source:MGI Symbol;Acc:MGI:2443131]
Serpinb6c	1.26291	4.55958	3.61037	0.0219932	ENSMUSG00000052180	serine (or cysteine) peptidase inhibitor, clade B, member 6c [Source:MGI Symbol;Acc:MGI:2145481]
Ifi205	8.07207	29.063	3.60044	0.00170079	ENSMUSG00000054203	interferon activated gene 205 [Source:MGI Symbol;Acc:MGI:101847]
Cd7	6.45007	23.2066	3.59788	0.0131167	ENSMUSG00000025163	CD7 antigen [Source:MGI Symbol;Acc:MGI:88344]
Ptger2	5.94362	21.3815	3.59738	0.00115403	ENSMUSG00000037759	prostaglandin E receptor 2 (subtype EP2) [Source:MGI Symbol;Acc:MGI:97794]
Fam13a	3.26679	11.6874	3.57764	0.00716496	ENSMUSG00000037709	family with sequence similarity 13, member A [Source:MGI Symbol;Acc:MGI:1889842]
Cd86	0.858617	3.04407	3.54532	0.029243	ENSMUSG00000022901	CD86 antigen [Source:MGI Symbol;Acc:MGI:101773]
Gpr171	1.33856	4.70233	3.51297	0.012713	ENSMUSG00000050075	G protein-coupled receptor 171 [Source:MGI Symbol;Acc:MGI:2442043]
Hp	23.8778	82.5613	3.45767	0.0160686	ENSMUSG00000031722	haptoglobin [Source:MGI Symbol;Acc:MGI:96211]
A530064D06Rik	0.398466	1.3741	3.44847	0.0343073	ENSMUSG00000043939	RIKEN cDNA A530064D06 gene [Source:MGI Symbol;Acc:MGI:2443476]
Cxcl17	14.524	50.0407	3.44537	0.000213559	ENSMUSG00000060188	chemokine (C-X-C motif) ligand 17 [Source:MGI Symbol;Acc:MGI:2387642]
Zfp758	1.6068	5.52179	3.43652	0.0338423	ENSMUSG00000044501	zinc finger protein 758 [Source:MGI Symbol;Acc:MGI:2385044]
Lrr1	0.336744	1.14713	3.40655	0.0204448	ENSMUSG00000034883	leucine rich repeat protein 1 [Source:MGI Symbol;Acc:MGI:1916956]
Primpol	1.28966	4.32109	3.35056	0.00694897	ENSMUSG00000038225	primase and polymerase (DNA-directed) [Source:MGI Symbol;Acc:MGI:3603756]
Rbm41	1.09843	3.64808	3.32118	0.0382395	ENSMUSG00000031433	RNA binding motif protein 41 [Source:MGI Symbol;Acc:MGI:2444923]
Tlr2	6.19774	20.5727	3.31938	0.0318442	ENSMUSG00000027995	toll-like receptor 2 [Source:MGI Symbol;Acc:MGI:1346060]
F13a1	8.51827	28.1602	3.30586	0.00203194	ENSMUSG00000039109	coagulation factor XIII, A1 subunit [Source:MGI Symbol;Acc:MGI:1921395]
Pla2g4b	1.05084	3.46655	3.29882	0.0286008	ENSMUSG00000098488	phospholipase A2, group IVB (cytosolic) [Source:MGI Symbol;Acc:MGI:2384819]
Tespa1	1.04461	3.4341	3.28744	0.0254821	ENSMUSG00000034833	thymocyte expressed, positive selection associated 1 [Source:MGI Symbol;Acc:MGI:1914846]
Pck1	1.6483	5.40891	3.2815	0.0319486	ENSMUSG00000027513	phosphoenolpyruvate carboxykinase 1, cytosolic [Source:MGI Symbol;Acc:MGI:97501]
Slc28a2	0.568887	1.86529	3.27884	0.00356824	ENSMUSG00000027219	solute carrier family 28 (sodium-coupled nucleoside transporter), member 2 [Source:MGI Symbol;Acc:MGI:1913105]
Rnf130	15.8205	51.561	3.25913	0.0162427	ENSMUSG00000020376	ring finger protein 130 [Source:MGI Symbol;Acc:MGI:1891717]
Mpv17l	0.468545	1.52494	3.25463	0.033666	ENSMUSG00000022679	Mpv17 transgene, kidney disease mutant-like [Source:MGI Symbol;Acc:MGI:2135951]
Pcolce2	2.29684	7.46168	3.24868	0.00928456	ENSMUSG00000015354	procollagen C-endopeptidase enhancer 2 [Source:MGI Symbol;Acc:MGI:1923727]
Gm5136	0.88487	2.86185	3.2342	0.0297731	ENSMUSG00000112039	predicted gene 5136 [Source:MGI Symbol;Acc:MGI:3647286]
Sat1	70.0893	223.938	3.19503	0.00411871	ENSMUSG00000025283	spermidine/spermine N1-acetyl transferase 1 [Source:MGI Symbol;Acc:MGI:98233]
Zfp455	0.909729	2.89932	3.18701	0.0356264	ENSMUSG00000051037	zinc finger protein 455 [Source:MGI Symbol;Acc:MGI:3040708]
Lifr	6.76373	21.4497	3.17128	0.000997445	ENSMUSG00000054263	leukemia inhibitory factor receptor [Source:MGI Symbol;Acc:MGI:96788]
Tmem140	2.4947	7.83064	3.13891	0.0400678	ENSMUSG00000057137	transmembrane protein 140 [Source:MGI Symbol;Acc:MGI:1915737]
St8sia4	4.50737	14.1251	3.13379	0.00880219	ENSMUSG00000040710	ST8 alpha-N-acetyl-neuraminide alpha-2,8-sialyltransferase 4 [Source:MGI Symbol;Acc:MGI:106018]
Cd226	0.745359	2.32975	3.12567	0.041178	ENSMUSG00000034028	CD226 antigen [Source:MGI Symbol;Acc:MGI:3039602]
Siglecg	0.578486	1.79781	3.10778	0.00492491	ENSMUSG00000030468	sialic acid binding Ig-like lectin G [Source:MGI Symbol;Acc:MGI:2443630]
F5	1.40147	4.31775	3.08086	0.0174533	ENSMUSG00000026579	coagulation factor V [Source:MGI Symbol;Acc:MGI:88382]
Msc	2.19826	6.71728	3.05573	0.0201896	ENSMUSG00000025930	musculin [Source:MGI Symbol;Acc:MGI:1333884]
Sla2	0.969157	2.94949	3.04336	0.0155098	ENSMUSG00000027636	Src-like-adaptor 2 [Source:MGI Symbol;Acc:MGI:1925049]
Gda	2.86109	8.69	3.0373	0.0413307	ENSMUSG00000058624	guanine deaminase [Source:MGI Symbol;Acc:MGI:95678]
Ecm2	3.65728	11.0773	3.02884	0.0272828	ENSMUSG00000043631	extracellular matrix protein 2, female organ and adipocyte specific [Source:MGI Symbol;Acc:MGI:3039578]
Dram1	5.8878	17.8183	3.0263	0.00945281	ENSMUSG00000020057	DNA-damage regulated autophagy modulator 1 [Source:MGI Symbol;Acc:MGI:1918962]
Tm4sf1	67.7685	203.453	3.00218	0.0203377	ENSMUSG00000027800	transmembrane 4 superfamily member 1 [Source:MGI Symbol;Acc:MGI:104678]
Atp5s	1.94222	5.81342	2.99318	0.0285216	ENSMUSG00000054894	ATP synthase, H+ transporting, mitochondrial F0 complex, subunit S [Source:MGI Symbol;Acc:MGI:1915305]
Rnase6	3.12063	9.33626	2.99179	0.011193	ENSMUSG00000021880	ribonuclease, RNase A family, 6 [Source:MGI Symbol;Acc:MGI:1925666]
9230110C19Rik	2.38368	7.09051	2.97461	0.00138636	ENSMUSG00000053070	RIKEN cDNA 9230110C19 gene [Source:MGI Symbol;Acc:MGI:3045346]
Nxpe5	2.62103	7.79612	2.97445	0.0199822	ENSMUSG00000047592	neurexophilin and PC-esterase domain family, member 5 [Source:MGI Symbol;Acc:MGI:3584036]
Plag1	0.341103	1.00191	2.93725	0.020841	ENSMUSG00000003282	pleiomorphic adenoma gene 1 [Source:MGI Symbol;Acc:MGI:1891916]
Perm1	0.603304	1.7591	2.91578	0.0107901	ENSMUSG00000078486	PPARGC1 and ESRR induced regulator, muscle 1 [Source:MGI Symbol;Acc:MGI:1921433]
Hspb11	13.9554	40.6716	2.91441	0.00504683	ENSMUSG00000063172	heat shock protein family B (small), member 11 [Source:MGI Symbol;Acc:MGI:1920188]
Tnfrsf9	5.39056	15.6468	2.90263	0.0293023	ENSMUSG00000028965	tumor necrosis factor receptor superfamily, member 9 [Source:MGI Symbol;Acc:MGI:1101059]
Ccl9	2.55893	7.42213	2.90048	0.00839796	ENSMUSG00000019122	chemokine (C-C motif) ligand 9 [Source:MGI Symbol;Acc:MGI:104533]
Tlr6	1.03558	2.99828	2.89527	0.0166472	ENSMUSG00000051498	toll-like receptor 6 [Source:MGI Symbol;Acc:MGI:1341296]
S100a4	68.2137	196.904	2.88658	0.034471	ENSMUSG00000001020	S100 calcium binding protein A4 [Source:MGI Symbol;Acc:MGI:1330282]
P2rx2	0.903312	2.59545	2.87325	0.0217977	ENSMUSG00000029503	purinergic receptor P2X, ligand-gated ion channel, 2 [Source:MGI Symbol;Acc:MGI:2665170]
Vtcn1	15.3394	44.0077	2.86894	0.0163318	ENSMUSG00000051076	V-set domain containing T cell activation inhibitor 1 [Source:MGI Symbol;Acc:MGI:3039619]
Anxa8	1.51731	4.33525	2.8572	0.00686458	ENSMUSG00000021950	annexin A8 [Source:MGI Symbol;Acc:MGI:1201374]
Card14	0.714365	2.03211	2.84463	0.0393624	ENSMUSG00000013483	caspase recruitment domain family, member 14 [Source:MGI Symbol;Acc:MGI:2386258]
Plac8	414.595	1177.38	2.83983	0.048028	ENSMUSG00000029322	placenta-specific 8 [Source:MGI Symbol;Acc:MGI:2445289]
Map3k8	3.15501	8.95506	2.83836	0.0211047	ENSMUSG00000024235	mitogen-activated protein kinase kinase kinase 8 [Source:MGI Symbol;Acc:MGI:1346878]
Dpep1	12.3672	35.0989	2.83807	0.00101195	ENSMUSG00000019278	dipeptidase 1 (renal) [Source:MGI Symbol;Acc:MGI:94917]
Clca2	1.73558	4.8988	2.82257	0.00550049	ENSMUSG00000036960	chloride channel accessory 2 [Source:MGI Symbol;Acc:MGI:2139758]
Ctbs	3.58811	10.0392	2.79791	0.0126252	ENSMUSG00000028189	chitobiase, di-N-acetyl- [Source:MGI Symbol;Acc:MGI:1921495]
Ctla2a	1632.88	4527.92	2.77296	0.0215579	ENSMUSG00000044258	cytotoxic T lymphocyte-associated protein 2 alpha [Source:MGI Symbol;Acc:MGI:88554]
Clec2d	54.8945	152.108	2.77092	0.0169987	ENSMUSG00000030157	C-type lectin domain family 2, member d [Source:MGI Symbol;Acc:MGI:2135589]
Ccr3	1.17939	3.25778	2.76226	0.0165861	ENSMUSG00000035448	chemokine (C-C motif) receptor 3 [Source:MGI Symbol;Acc:MGI:104616]
Lck	5.64578	15.5855	2.76055	0.000479679	ENSMUSG00000000409	lymphocyte protein tyrosine kinase [Source:MGI Symbol;Acc:MGI:96756]
Stat4	0.954598	2.63152	2.75668	0.0125965	ENSMUSG00000062939	signal transducer and activator of transcription 4 [Source:MGI Symbol;Acc:MGI:103062]
Ipcef1	1.18624	3.2627	2.75047	0.0293943	ENSMUSG00000064065	interaction protein for cytohesin exchange factors 1 [Source:MGI Symbol;Acc:MGI:2444159]
Lox	16.5779	45.1001	2.7205	0.00505552	ENSMUSG00000024529	lysyl oxidase [Source:MGI Symbol;Acc:MGI:96817]
Fcrla	0.9369	2.54827	2.7199	0.040663	ENSMUSG00000038421	Fc receptor-like A [Source:MGI Symbol;Acc:MGI:2138647]
Klrb1c	3.29669	8.95348	2.7159	0.0309162	ENSMUSG00000030325	killer cell lectin-like receptor subfamily B member 1C [Source:MGI Symbol;Acc:MGI:107538]
Mycn	1.63019	4.42281	2.71306	0.0430164	ENSMUSG00000037169	v-myc avian myelocytomatosis viral related oncogene, neuroblastoma derived [Source:MGI Symbol;Acc:MGI:97357]
Ndrg1	25.7232	69.7621	2.71203	0.0320546	ENSMUSG00000005125	N-myc downstream regulated gene 1 [Source:MGI Symbol;Acc:MGI:1341799]
Irak3	3.47108	9.39219	2.70584	0.000263721	ENSMUSG00000020227	interleukin-1 receptor-associated kinase 3 [Source:MGI Symbol;Acc:MGI:1921164]
Abca8b	1.12693	3.03716	2.69507	0.0084414	ENSMUSG00000020620	ATP-binding cassette, sub-family A (ABC1), member 8b [Source:MGI Symbol;Acc:MGI:1351668]
Cst7	3.29196	8.84561	2.68703	0.00893733	ENSMUSG00000068129	cystatin F (leukocystatin) [Source:MGI Symbol;Acc:MGI:1298217]
Zfp759	1.80636	4.85207	2.68611	0.0478823	ENSMUSG00000057396	zinc finger protein 759 [Source:MGI Symbol;Acc:MGI:2446280]
Rnase4	139.539	373.994	2.68021	0.00288062	ENSMUSG00000021876	ribonuclease, RNase A family 4 [Source:MGI Symbol;Acc:MGI:1926217]
Fap	3.06531	8.20775	2.67763	0.00216795	ENSMUSG00000000392	fibroblast activation protein [Source:MGI Symbol;Acc:MGI:109608]
Rhoh	0.413936	1.09147	2.63682	0.0374934	ENSMUSG00000029204	ras homolog family member H [Source:MGI Symbol;Acc:MGI:1921984]
Chodl	5.24485	13.7874	2.62875	0.00433578	ENSMUSG00000022860	chondrolectin [Source:MGI Symbol;Acc:MGI:2179069]
Gm13277	0.384605	1.00774	2.62019	0.00671601	ENSMUSG00000100234	predicted gene 13277 [Source:MGI Symbol;Acc:MGI:3701974]
Sgtb	1.02807	2.67456	2.60153	0.0263383	ENSMUSG00000042743	small glutamine-rich tetratricopeptide repeat (TPR)-containing, beta [Source:MGI Symbol;Acc:MGI:2444615]
Fgf12	0.710953	1.84661	2.59737	0.030974	ENSMUSG00000022523	fibroblast growth factor 12 [Source:MGI Symbol;Acc:MGI:109183]
Scn7a	2.18369	5.66399	2.59377	0.046241	ENSMUSG00000034810	sodium channel, voltage-gated, type VII, alpha [Source:MGI Symbol;Acc:MGI:102965]
Ccr2	12.2738	31.6997	2.58271	0.0170624	ENSMUSG00000049103	chemokine (C-C motif) receptor 2 [Source:MGI Symbol;Acc:MGI:106185]
P2ry10	1.17567	3.03579	2.58217	0.00634523	ENSMUSG00000050921	purinergic receptor P2Y, G-protein coupled 10 [Source:MGI Symbol;Acc:MGI:1926076]
March1	1.68307	4.34525	2.58174	0.00806838	ENSMUSG00000036469	membrane-associated ring finger (C3HC4) 1 [Source:MGI Symbol;Acc:MGI:1920175]
Zfp40	2.08352	5.37792	2.58118	0.0400904	ENSMUSG00000002617	zinc finger protein 40 [Source:MGI Symbol;Acc:MGI:99185]
Sp100	12.1759	31.3635	2.57586	0.0054343	ENSMUSG00000026222	nuclear antigen Sp100 [Source:MGI Symbol;Acc:MGI:109561]
Efhc1	1.53678	3.9488	2.56953	0.0183329	ENSMUSG00000041809	EF-hand domain (C-terminal) containing 1 [Source:MGI Symbol;Acc:MGI:1919127]
Ier3	25.5166	65.5507	2.56895	0.012078	ENSMUSG00000003541	immediate early response 3 [Source:MGI Symbol;Acc:MGI:104814]
Mgst1	62.4709	158.8	2.54199	0.0381016	ENSMUSG00000008540	microsomal glutathione S-transferase 1 [Source:MGI Symbol;Acc:MGI:1913850]
Pgf	5.89643	14.9564	2.53652	0.0111627	ENSMUSG00000004791	placental growth factor [Source:MGI Symbol;Acc:MGI:105095]
Klrb1f	1.00224	2.53881	2.53314	0.0287194	ENSMUSG00000030154	killer cell lectin-like receptor subfamily B member 1F [Source:MGI Symbol;Acc:MGI:2442965]
S100a1	60.9919	154.501	2.53314	0.00147916	ENSMUSG00000044080	S100 calcium binding protein A1 [Source:MGI Symbol;Acc:MGI:1338917]
A530032D15Rik	0.86919	2.19526	2.52564	0.0444864	ENSMUSG00000089844	RIKEN cDNA A530032D15Rik gene [Source:MGI Symbol;Acc:MGI:3037746]
Kcnt2	2.60608	6.58001	2.52487	0.0123723	ENSMUSG00000052726	potassium channel, subfamily T, member 2 [Source:MGI Symbol;Acc:MGI:3036273]
Hmgcs2	25.8744	65.2168	2.52052	0.0281903	ENSMUSG00000027875	3-hydroxy-3-methylglutaryl-Coenzyme A synthase 2 [Source:MGI Symbol;Acc:MGI:101939]
Hpgds	3.50232	8.8155	2.51704	0.0342362	ENSMUSG00000029919	hematopoietic prostaglandin D synthase [Source:MGI Symbol;Acc:MGI:1859384]
Ugt1a6b	4.75808	11.9621	2.51406	0.0132979	ENSMUSG00000090145	UDP glucuronosyltransferase 1 family, polypeptide A6B [Source:MGI Symbol;Acc:MGI:3580629]
Trmt10b	3.93767	9.89691	2.51339	0.0117481	ENSMUSG00000035601	tRNA methyltransferase 10B [Source:MGI Symbol;Acc:MGI:1917184]
Acer3	3.33617	8.36705	2.50798	0.0132397	ENSMUSG00000030760	alkaline ceramidase 3 [Source:MGI Symbol;Acc:MGI:1913440]
Ugt1a6a	3.42288	8.52468	2.4905	0.0440198	ENSMUSG00000054545	UDP glucuronosyltransferase 1 family, polypeptide A6A [Source:MGI Symbol;Acc:MGI:2137698]
Adprm	6.44997	15.9647	2.47516	0.0100265	ENSMUSG00000020910	ADP-ribose/CDP-alcohol diphosphatase, manganese dependent [Source:MGI Symbol;Acc:MGI:1913608]
Zfp112	1.75382	4.34027	2.47475	0.0426891	ENSMUSG00000052675	zinc finger protein 112 [Source:MGI Symbol;Acc:MGI:1929115]
Il15	8.5629	21.0893	2.46287	0.0286138	ENSMUSG00000031712	interleukin 15 [Source:MGI Symbol;Acc:MGI:103014]
Fmo5	1.27554	3.13035	2.45413	0.0167138	ENSMUSG00000028088	flavin containing monooxygenase 5 [Source:MGI Symbol;Acc:MGI:1310004]
Gulp1	6.72878	16.4908	2.45079	0.00923881	ENSMUSG00000056870	GULP, engulfment adaptor PTB domain containing 1 [Source:MGI Symbol;Acc:MGI:1920407]
Slc35d2	2.95649	7.24043	2.449	0.0369737	ENSMUSG00000033114	solute carrier family 35, member D2 [Source:MGI Symbol;Acc:MGI:1917734]
Plbd1	14.2422	34.7973	2.44326	0.0291939	ENSMUSG00000030214	phospholipase B domain containing 1 [Source:MGI Symbol;Acc:MGI:1914107]
Tlr1	2.78995	6.81147	2.44143	0.00472941	ENSMUSG00000044827	toll-like receptor 1 [Source:MGI Symbol;Acc:MGI:1341295]
Tcp11l2	15.4311	37.6347	2.43888	0.0470099	ENSMUSG00000020034	t-complex 11 (mouse) like 2 [Source:MGI Symbol;Acc:MGI:2444679]
Dcn	533.721	1295.46	2.42722	0.0011413	ENSMUSG00000019929	decorin [Source:MGI Symbol;Acc:MGI:94872]
Clec4b1	3.89853	9.44363	2.42235	0.0201987	ENSMUSG00000030147	C-type lectin domain family 4, member b1 [Source:MGI Symbol;Acc:MGI:1917060]
Mndal	9.33035	22.4958	2.41103	0.0157133	ENSMUSG00000090272	myeloid nuclear differentiation antigen like [Source:MGI Symbol;Acc:MGI:3780953]
Alg6	3.11358	7.50663	2.41094	0.00367624	ENSMUSG00000073792	asparagine-linked glycosylation 6 (alpha-1,3,-glucosyltransferase) [Source:MGI Symbol;Acc:MGI:2444031]
Gimap4	13.5047	32.5525	2.41045	0.0364763	ENSMUSG00000054435	GTPase, IMAP family member 4 [Source:MGI Symbol;Acc:MGI:1349656]
Flt3	1.12475	2.70558	2.40549	0.00605175	ENSMUSG00000042817	FMS-like tyrosine kinase 3 [Source:MGI Symbol;Acc:MGI:95559]
Rpl9	1511.07	3630.01	2.40227	0.0122189	ENSMUSG00000047215	ribosomal protein L9 [Source:MGI Symbol;Acc:MGI:1298373]
Atp8b4	1.44021	3.45908	2.40179	0.0248691	ENSMUSG00000060131	ATPase, class I, type 8B, member 4 [Source:MGI Symbol;Acc:MGI:1859664]
Cep57l1	2.14106	5.111	2.38714	0.006207	ENSMUSG00000019813	centrosomal protein 57-like 1 [Source:MGI Symbol;Acc:MGI:1915511]
Ms4a6b	7.18935	17.0987	2.37833	0.0393478	ENSMUSG00000024677	membrane-spanning 4-domains, subfamily A, member 6B [Source:MGI Symbol;Acc:MGI:1917024]
Rps25	805.822	1910.44	2.3708	0.0188942	ENSMUSG00000009927	ribosomal protein S25 [Source:MGI Symbol;Acc:MGI:1922867]
Gprin3	2.82548	6.6955	2.36968	0.0399614	ENSMUSG00000045441	GPRIN family member 3 [Source:MGI Symbol;Acc:MGI:1924785]
Chmp4c	1.43981	3.39024	2.35464	0.0381079	ENSMUSG00000027536	charged multivesicular body protein 4C [Source:MGI Symbol;Acc:MGI:1913621]
Tmsb4x	3067.21	7214.74	2.35221	0.00642754	ENSMUSG00000049775	thymosin, beta 4, X chromosome [Source:MGI Symbol;Acc:MGI:99510]
Tmem29	10.9351	25.6356	2.34435	0.0143556	ENSMUSG00000041353	transmembrane protein 29 [Source:MGI Symbol;Acc:MGI:1923420]
Bnip3l	18.2195	42.6659	2.34178	0.0380318	ENSMUSG00000022051	BCL2/adenovirus E1B interacting protein 3-like [Source:MGI Symbol;Acc:MGI:1332659]
Rdm1	12.559	29.3891	2.34007	0.024853	ENSMUSG00000010362	RAD52 motif 1 [Source:MGI Symbol;Acc:MGI:1913849]
Eif3e	63.7612	148.934	2.3358	0.0447696	ENSMUSG00000022336	eukaryotic translation initiation factor 3, subunit E [Source:MGI Symbol;Acc:MGI:99257]
Klhdc1	1.69136	3.93714	2.3278	0.0184988	ENSMUSG00000051890	kelch domain containing 1 [Source:MGI Symbol;Acc:MGI:2672853]
Depdc7	1.62314	3.75438	2.31304	0.0259559	ENSMUSG00000027173	DEP domain containing 7 [Source:MGI Symbol;Acc:MGI:2139258]
Gpr35	0.872707	2.01846	2.31288	0.0068231	ENSMUSG00000026271	G protein-coupled receptor 35 [Source:MGI Symbol;Acc:MGI:1929509]
Dram2	11.3445	26.2366	2.31273	0.0219434	ENSMUSG00000027900	DNA-damage regulated autophagy modulator 2 [Source:MGI Symbol;Acc:MGI:1914421]
Cyr61	8.79859	20.2773	2.30461	0.0082839	ENSMUSG00000028195	cysteine rich protein 61 [Source:MGI Symbol;Acc:MGI:88613]
Clec1a	2.17186	5.00185	2.30303	0.048076	ENSMUSG00000033082	C-type lectin domain family 1, member a [Source:MGI Symbol;Acc:MGI:2444151]
Afmid	1.15628	2.65532	2.29643	0.0151338	ENSMUSG00000017718	arylformamidase [Source:MGI Symbol;Acc:MGI:2448704]
Abca8a	4.08867	9.38527	2.29543	0.013434	ENSMUSG00000041828	ATP-binding cassette, sub-family A (ABC1), member 8a [Source:MGI Symbol;Acc:MGI:2386846]
Il2rb	11.3282	25.8963	2.286	0.00499687	ENSMUSG00000068227	interleukin 2 receptor, beta chain [Source:MGI Symbol;Acc:MGI:96550]
Ssr4	120.068	274.432	2.28564	0.00476475	ENSMUSG00000002014	signal sequence receptor, delta [Source:MGI Symbol;Acc:MGI:1099464]
Samsn1	1.09345	2.49867	2.28512	0.0347378	ENSMUSG00000022876	SAM domain, SH3 domain and nuclear localization signals, 1 [Source:MGI Symbol;Acc:MGI:1914992]
Agbl3	2.60253	5.94658	2.28493	0.0330124	ENSMUSG00000038836	ATP/GTP binding protein-like 3 [Source:MGI Symbol;Acc:MGI:1923473]
Cenpq	3.31984	7.55379	2.27535	0.0374619	ENSMUSG00000023919	centromere protein Q [Source:MGI Symbol;Acc:MGI:1933744]
Pip5k1b	3.72503	8.4526	2.26914	0.0328202	ENSMUSG00000024867	phosphatidylinositol-4-phosphate 5-kinase, type 1 beta [Source:MGI Symbol;Acc:MGI:107930]
Nr1d2	15.7041	35.6081	2.26744	0.0254668	ENSMUSG00000021775	nuclear receptor subfamily 1, group D, member 2 [Source:MGI Symbol;Acc:MGI:2449205]
Ptprc	14.1449	31.9539	2.25904	0.011792	ENSMUSG00000026395	protein tyrosine phosphatase, receptor type, C [Source:MGI Symbol;Acc:MGI:97810]
Fam151b	3.9241	8.8433	2.25359	0.0383164	ENSMUSG00000034334	family with sequence similarity 151, member B [Source:MGI Symbol;Acc:MGI:1921192]
Appl2	18.3801	41.2645	2.24506	0.0188907	ENSMUSG00000020263	adaptor protein, phosphotyrosine interaction, PH domain and leucine zipper containing 2 [Source:MGI Symbol;Acc:MGI:2384914]
Zc2hc1a	6.06068	13.5644	2.2381	0.0226007	ENSMUSG00000043542	zinc finger, C2HC-type containing 1A [Source:MGI Symbol;Acc:MGI:1914556]
Lilra6	1.24149	2.77384	2.23428	0.0179806	ENSMUSG00000030427	leukocyte immunoglobulin-like receptor, subfamily A (with TM domain), member 6 [Source:MGI Symbol;Acc:MGI:1195969]
Zfp189	2.46938	5.51137	2.23189	0.0013289	ENSMUSG00000039634	zinc finger protein 189 [Source:MGI Symbol;Acc:MGI:2444707]
Rdh11	11.2873	25.1239	2.22584	0.0263842	ENSMUSG00000066441	retinol dehydrogenase 11 [Source:MGI Symbol;Acc:MGI:102581]
Gpx2	56.8388	126.395	2.22375	0.0240694	ENSMUSG00000042808	glutathione peroxidase 2 [Source:MGI Symbol;Acc:MGI:106609]
Slc25a53	0.655212	1.45652	2.22298	0.0447055	ENSMUSG00000044348	solute carrier family 25, member 53 [Source:MGI Symbol;Acc:MGI:1914312]
Sult1a1	27.2143	60.188	2.21164	0.0423078	ENSMUSG00000030711	sulfotransferase family 1A, phenol-preferring, member 1 [Source:MGI Symbol;Acc:MGI:102896]
Ccl6	15.5374	34.315	2.20854	0.0181932	ENSMUSG00000018927	chemokine (C-C motif) ligand 6 [Source:MGI Symbol;Acc:MGI:98263]
Tgif1	16.7004	36.7637	2.20137	0.0401126	ENSMUSG00000047407	TGFB-induced factor homeobox 1 [Source:MGI Symbol;Acc:MGI:1194497]
Cebpd	9.61917	21.1747	2.2013	0.0269802	ENSMUSG00000071637	CCAAT/enhancer binding protein (C/EBP), delta [Source:MGI Symbol;Acc:MGI:103573]
6720489N17Rik	1.10723	2.43574	2.19985	0.0237624	ENSMUSG00000072066	RIKEN cDNA 6720489N17 gene [Source:MGI Symbol;Acc:MGI:2443901]
Serpinb6a	94.6995	208.281	2.19939	0.00797051	ENSMUSG00000060147	serine (or cysteine) peptidase inhibitor, clade B, member 6a [Source:MGI Symbol;Acc:MGI:103123]
Tifa	3.76078	8.24715	2.19294	0.00739873	ENSMUSG00000046688	TRAF-interacting protein with forkhead-associated domain [Source:MGI Symbol;Acc:MGI:2182965]
Rgs2	124.082	271.86	2.19098	0.0391326	ENSMUSG00000026360	regulator of G-protein signaling 2 [Source:MGI Symbol;Acc:MGI:1098271]
Pot1b	3.16989	6.92692	2.18522	0.0385373	ENSMUSG00000024174	protection of telomeres 1B [Source:MGI Symbol;Acc:MGI:1920086]
Gnpnat1	6.6692	14.5618	2.18344	0.0361005	ENSMUSG00000037722	glucosamine-phosphate N-acetyltransferase 1 [Source:MGI Symbol;Acc:MGI:1858963]
Stox1	0.577873	1.26102	2.18217	0.0227353	ENSMUSG00000036923	storkhead box 1 [Source:MGI Symbol;Acc:MGI:2684909]
Pla1a	10.1239	22.0646	2.17947	0.0128701	ENSMUSG00000002847	phospholipase A1 member A [Source:MGI Symbol;Acc:MGI:1934677]
Fbxl13	0.681095	1.4842	2.17914	0.038076	ENSMUSG00000048520	F-box and leucine-rich repeat protein 13 [Source:MGI Symbol;Acc:MGI:2443416]
Arhgdib	37.6491	81.9152	2.17576	0.0397902	ENSMUSG00000030220	Rho, GDP dissociation inhibitor (GDI) beta [Source:MGI Symbol;Acc:MGI:101940]
Aftph	7.94342	17.2272	2.16874	0.00433289	ENSMUSG00000049659	aftiphilin [Source:MGI Symbol;Acc:MGI:1923012]
Atp5e	264.779	574.007	2.16787	0.0201926	ENSMUSG00000016252	ATP synthase, H+ transporting, mitochondrial F1 complex, epsilon subunit [Source:MGI Symbol;Acc:MGI:1855697]
Aqp5	10.2369	22.1464	2.1634	0.00809146	ENSMUSG00000044217	aquaporin 5 [Source:MGI Symbol;Acc:MGI:106215]
Iigp1	10.0042	21.6428	2.16337	0.0349184	ENSMUSG00000054072	interferon inducible GTPase 1 [Source:MGI Symbol;Acc:MGI:1926259]
Chp2	8.96095	19.3816	2.16289	0.00702656	ENSMUSG00000030865	calcineurin-like EF hand protein 2 [Source:MGI Symbol;Acc:MGI:1917511]
Sh2d2a	1.30936	2.80717	2.14392	0.0289614	ENSMUSG00000028071	SH2 domain containing 2A [Source:MGI Symbol;Acc:MGI:1351596]
Cd47	15.4948	33.1811	2.14143	0.00799986	ENSMUSG00000055447	CD47 antigen (Rh-related antigen, integrin-associated signal transducer) [Source:MGI Symbol;Acc:MGI:96617]
Acy3	1.67306	3.57451	2.13651	0.0427064	ENSMUSG00000024866	aspartoacylase (aminoacylase) 3 [Source:MGI Symbol;Acc:MGI:1918920]
Bnip3	11.2483	24.0059	2.13417	0.0485099	ENSMUSG00000078566	BCL2/adenovirus E1B interacting protein 3 [Source:MGI Symbol;Acc:MGI:109326]
Dlgap5	1.9422	4.14216	2.13272	0.0155297	ENSMUSG00000037544	discs, large (Drosophila) homolog-associated protein 5 [Source:MGI Symbol;Acc:MGI:2183453]
Rplp2	840.605	1792.46	2.13235	0.00550531	ENSMUSG00000025508	ribosomal protein, large P2 [Source:MGI Symbol;Acc:MGI:1914436]
Tmed3	103.888	221.385	2.13101	0.00927563	ENSMUSG00000032353	transmembrane p24 trafficking protein 3 [Source:MGI Symbol;Acc:MGI:1913361]
Rtp4	14.227	30.2389	2.12546	0.0302748	ENSMUSG00000033355	receptor transporter protein 4 [Source:MGI Symbol;Acc:MGI:1915025]
Nfil3	24.9283	52.8571	2.12036	0.00589077	ENSMUSG00000056749	nuclear factor, interleukin 3, regulated [Source:MGI Symbol;Acc:MGI:109495]
Clec4a1	4.04028	8.55874	2.11836	0.026376	ENSMUSG00000049037	C-type lectin domain family 4, member a1 [Source:MGI Symbol;Acc:MGI:3036291]
St3gal6	10.2831	21.7513	2.11525	0.0251596	ENSMUSG00000022747	ST3 beta-galactoside alpha-2,3-sialyltransferase 6 [Source:MGI Symbol;Acc:MGI:1888707]
Rps17	1097.85	2321.92	2.11497	0.047315	ENSMUSG00000061787	ribosomal protein S17 [Source:MGI Symbol;Acc:MGI:1309526]
Tmem229a	1.01273	2.14186	2.11494	0.0444002	ENSMUSG00000048022	transmembrane protein 229A [Source:MGI Symbol;Acc:MGI:2442812]
Crem	6.14092	12.9713	2.11228	0.0182072	ENSMUSG00000063889	cAMP responsive element modulator [Source:MGI Symbol;Acc:MGI:88495]
Pnp	16.0825	33.9332	2.10994	0.0268776	ENSMUSG00000021871	purine-nucleoside phosphorylase [Source:MGI Symbol;Acc:MGI:97365]
Best1	1.53537	3.23895	2.10956	1.19259e-06	ENSMUSG00000037418	bestrophin 1 [Source:MGI Symbol;Acc:MGI:1346332]
1110059E24Rik	19.7849	41.7357	2.10947	0.0102218	ENSMUSG00000035171	RIKEN cDNA 1110059E24 gene [Source:MGI Symbol;Acc:MGI:1913456]
Ctsw	13.2958	27.9966	2.10567	0.032869	ENSMUSG00000024910	cathepsin W [Source:MGI Symbol;Acc:MGI:1338045]
Zfp786	1.24223	2.60603	2.09786	0.0114386	ENSMUSG00000051499	zinc finger protein 786 [Source:MGI Symbol;Acc:MGI:3026883]
Pla2g7	16.8436	35.2875	2.09501	0.0236254	ENSMUSG00000023913	phospholipase A2, group VII (platelet-activating factor acetylhydrolase, plasma) [Source:MGI Symbol;Acc:MGI:1351327]
Smim15	21.5661	45.0956	2.09104	0.00455236	ENSMUSG00000071180	small integral membrane protein 15 [Source:MGI Symbol;Acc:MGI:1922866]
Ndufb2	62.6786	130.955	2.08931	0.0328813	ENSMUSG00000002416	NADH dehydrogenase (ubiquinone) 1 beta subcomplex, 2 [Source:MGI Symbol;Acc:MGI:1915448]
Abcg3	0.909868	1.89196	2.07938	0.0434458	ENSMUSG00000029299	ATP-binding cassette, sub-family G (WHITE), member 3 [Source:MGI Symbol;Acc:MGI:1351624]
Trim23	5.19	10.7771	2.07652	0.0240034	ENSMUSG00000021712	tripartite motif-containing 23 [Source:MGI Symbol;Acc:MGI:1933161]
Sptssa	89.4765	185.689	2.07529	0.0247665	ENSMUSG00000044408	serine palmitoyltransferase, small subunit A [Source:MGI Symbol;Acc:MGI:1913399]
Rps7	579.594	1201.19	2.07248	0.0386422	ENSMUSG00000061477	ribosomal protein S7 [Source:MGI Symbol;Acc:MGI:1333818]
Pnp2	8.27623	17.1302	2.06981	0.0270575	ENSMUSG00000068417	purine-nucleoside phosphorylase 2 [Source:MGI Symbol;Acc:MGI:3712328]
Lin7a	2.48454	5.14093	2.06916	0.0447002	ENSMUSG00000019906	lin-7 homolog A (C. elegans) [Source:MGI Symbol;Acc:MGI:2135609]
Zfp712	1.00151	2.07177	2.06865	0.0389038	ENSMUSG00000090641	zinc finger protein 712 [Source:MGI Symbol;Acc:MGI:1925501]
Rhpn2	5.8244	12.0162	2.06308	0.0374601	ENSMUSG00000030494	rhophilin, Rho GTPase binding protein 2 [Source:MGI Symbol;Acc:MGI:1289234]
Ankdd1b	0.82188	1.69559	2.06306	0.0434742	ENSMUSG00000047117	ankyrin repeat and death domain containing 1B [Source:MGI Symbol;Acc:MGI:2444730]
Eef1b2	335.259	691.289	2.06195	0.0281881	ENSMUSG00000025967	eukaryotic translation elongation factor 1 beta 2 [Source:MGI Symbol;Acc:MGI:1929520]
Tmem100	48.5757	100.103	2.06077	0.0308485	ENSMUSG00000069763	transmembrane protein 100 [Source:MGI Symbol;Acc:MGI:1915138]
Ms4a6c	9.89052	20.2956	2.05203	0.0329849	ENSMUSG00000079419	membrane-spanning 4-domains, subfamily A, member 6C [Source:MGI Symbol;Acc:MGI:2385644]
Adhfe1	2.53156	5.19451	2.0519	0.0269038	ENSMUSG00000025911	alcohol dehydrogenase, iron containing, 1 [Source:MGI Symbol;Acc:MGI:1923437]
Rpl24	257.549	527.883	2.04964	0.0115651	ENSMUSG00000098274	ribosomal protein L24 [Source:MGI Symbol;Acc:MGI:1915443]
Cp	12.6146	25.7881	2.04431	0.0148724	ENSMUSG00000003617	ceruloplasmin [Source:MGI Symbol;Acc:MGI:88476]
1110034G24Rik	4.68861	9.56368	2.03977	0.0054749	ENSMUSG00000044991	RIKEN cDNA 1110034G24 gene [Source:MGI Symbol;Acc:MGI:1920997]
Rgs10	17.9805	36.6708	2.03948	0.0129617	ENSMUSG00000030844	regulator of G-protein signalling 10 [Source:MGI Symbol;Acc:MGI:1915115]
Gimap6	19.4868	39.7224	2.03843	0.0393754	ENSMUSG00000047867	GTPase, IMAP family member 6 [Source:MGI Symbol;Acc:MGI:1918876]
Trim12a	8.95673	18.1858	2.03041	0.0106618	ENSMUSG00000066258	tripartite motif-containing 12A [Source:MGI Symbol;Acc:MGI:1923931]
Exoc6	8.57754	17.3595	2.02384	0.00798709	ENSMUSG00000053799	exocyst complex component 6 [Source:MGI Symbol;Acc:MGI:1351611]
Arhgap15	3.22731	6.51393	2.01838	0.0316137	ENSMUSG00000049744	Rho GTPase activating protein 15 [Source:MGI Symbol;Acc:MGI:1923367]
Gng10	38.9274	78.4455	2.01517	0.001577	ENSMUSG00000038607	guanine nucleotide binding protein (G protein), gamma 10 [Source:MGI Symbol;Acc:MGI:1336169]
Oxr1	17.1243	34.3889	2.0082	0.0206073	ENSMUSG00000022307	oxidation resistance 1 [Source:MGI Symbol;Acc:MGI:2179326]
Arnt2	4.98507	10.0011	2.0062	0.0388586	ENSMUSG00000015709	aryl hydrocarbon receptor nuclear translocator 2 [Source:MGI Symbol;Acc:MGI:107188]
Phf7	1.7281	3.46063	2.00256	0.0436677	ENSMUSG00000021902	PHD finger protein 7 [Source:MGI Symbol;Acc:MGI:1919088]
Lgi4	2.39703	4.79878	2.00197	0.0407988	ENSMUSG00000036560	leucine-rich repeat LGI family, member 4 [Source:MGI Symbol;Acc:MGI:2180197]
Dock10	4.69107	9.39006	2.00169	0.0220902	ENSMUSG00000038608	dedicator of cytokinesis 10 [Source:MGI Symbol;Acc:MGI:2146320]
Pnck	19.4519	9.72002	0.499696	0.0370011	ENSMUSG00000002012	pregnancy upregulated non-ubiquitously expressed CaM kinase [Source:MGI Symbol;Acc:MGI:1347357]
Flrt1	3.01558	1.50438	0.49887	0.0497927	ENSMUSG00000047787	fibronectin leucine rich transmembrane protein 1 [Source:MGI Symbol;Acc:MGI:3026647]
Sec22c	2.79175	1.39	0.497897	0.00720259	ENSMUSG00000061536	SEC22 homolog C, vesicle trafficking protein [Source:MGI Symbol;Acc:MGI:2447871]
Tuba4a	16.9466	8.39841	0.49558	0.020074	ENSMUSG00000026202	tubulin, alpha 4A [Source:MGI Symbol;Acc:MGI:1095410]
Spns1	27.3026	13.5305	0.495576	0.0466762	ENSMUSG00000030741	spinster homolog 1 [Source:MGI Symbol;Acc:MGI:1920908]
Rgs9	5.13102	2.53823	0.494684	0.011931	ENSMUSG00000020599	regulator of G-protein signaling 9 [Source:MGI Symbol;Acc:MGI:1338824]
Tle3	40.3232	19.8834	0.493101	0.0446154	ENSMUSG00000032280	transducin-like enhancer of split 3 [Source:MGI Symbol;Acc:MGI:104634]
Cdkn1c	40.7511	20.0916	0.493031	0.0498229	ENSMUSG00000037664	cyclin-dependent kinase inhibitor 1C (P57) [Source:MGI Symbol;Acc:MGI:104564]
Shroom3	5.66103	2.79057	0.492944	0.048929	ENSMUSG00000029381	shroom family member 3 [Source:MGI Symbol;Acc:MGI:1351655]
Tln2	12.5103	6.16181	0.492539	0.00949637	ENSMUSG00000052698	talin 2 [Source:MGI Symbol;Acc:MGI:1917799]
Alcam	13.8259	6.80792	0.492404	0.00857165	ENSMUSG00000022636	activated leukocyte cell adhesion molecule [Source:MGI Symbol;Acc:MGI:1313266]
Mad1l1	24.9811	12.2688	0.491124	0.0249252	ENSMUSG00000029554	MAD1 mitotic arrest deficient 1-like 1 [Source:MGI Symbol;Acc:MGI:1341857]
Smox	69.0558	33.8712	0.49049	0.0144318	ENSMUSG00000027333	spermine oxidase [Source:MGI Symbol;Acc:MGI:2445356]
Ank	36.8897	18.0892	0.49036	0.0309527	ENSMUSG00000022265	progressive ankylosis [Source:MGI Symbol;Acc:MGI:3045421]
Proser2	8.78273	4.30092	0.489702	0.00148452	ENSMUSG00000045319	proline and serine rich 2 [Source:MGI Symbol;Acc:MGI:2442238]
Wwc1	25.8767	12.6633	0.489369	0.00152479	ENSMUSG00000018849	WW, C2 and coiled-coil domain containing 1 [Source:MGI Symbol;Acc:MGI:2388637]
Cds2	18.3947	8.91132	0.48445	0.00865782	ENSMUSG00000058793	CDP-diacylglycerol synthase (phosphatidate cytidylyltransferase) 2 [Source:MGI Symbol;Acc:MGI:1332236]
Abca7	9.86941	4.781	0.484426	0.0288293	ENSMUSG00000035722	ATP-binding cassette, sub-family A (ABC1), member 7 [Source:MGI Symbol;Acc:MGI:1351646]
Ilvbl	51.4829	24.9343	0.484322	0.0150228	ENSMUSG00000032763	ilvB (bacterial acetolactate synthase)-like [Source:MGI Symbol;Acc:MGI:1351911]
Pdzrn3	37.0573	17.9412	0.484148	0.00858511	ENSMUSG00000035357	PDZ domain containing RING finger 3 [Source:MGI Symbol;Acc:MGI:1933157]
Wdr70	8.28434	4.00701	0.483685	0.0328654	ENSMUSG00000039828	WD repeat domain 70 [Source:MGI Symbol;Acc:MGI:1921020]
Efnb2	22.7617	10.9917	0.482903	0.00725704	ENSMUSG00000001300	ephrin B2 [Source:MGI Symbol;Acc:MGI:105097]
Smad7	8.82741	4.25779	0.482338	0.00837361	ENSMUSG00000025880	SMAD family member 7 [Source:MGI Symbol;Acc:MGI:1100518]
Abca2	14.2076	6.84453	0.48175	0.0403586	ENSMUSG00000026944	ATP-binding cassette, sub-family A (ABC1), member 2 [Source:MGI Symbol;Acc:MGI:99606]
Arl14	3.70925	1.78323	0.480753	0.0326597	ENSMUSG00000098207	ADP-ribosylation factor-like 14 [Source:MGI Symbol;Acc:MGI:1918869]
Optn	6.71003	3.22524	0.480659	0.0302348	ENSMUSG00000026672	optineurin [Source:MGI Symbol;Acc:MGI:1918898]
Astn2	4.41764	2.12299	0.480571	0.0172944	ENSMUSG00000028373	astrotactin 2 [Source:MGI Symbol;Acc:MGI:1889277]
Myh11	374.034	178.648	0.477626	0.00141344	ENSMUSG00000018830	myosin, heavy polypeptide 11, smooth muscle [Source:MGI Symbol;Acc:MGI:102643]
Top1mt	9.60544	4.58727	0.477569	0.0193808	ENSMUSG00000000934	DNA topoisomerase 1, mitochondrial [Source:MGI Symbol;Acc:MGI:1920210]
Frem2	2.9345	1.39773	0.476309	0.0177231	ENSMUSG00000037016	Fras1 related extracellular matrix protein 2 [Source:MGI Symbol;Acc:MGI:2444465]
Aacs	15.6804	7.45364	0.475349	0.0332069	ENSMUSG00000029482	acetoacetyl-CoA synthetase [Source:MGI Symbol;Acc:MGI:1926144]
Tspan18	11.5572	5.47787	0.473979	0.0444686	ENSMUSG00000027217	tetraspanin 18 [Source:MGI Symbol;Acc:MGI:1917186]
Slc25a35	2.61641	1.23744	0.472954	0.0365951	ENSMUSG00000018740	solute carrier family 25, member 35 [Source:MGI Symbol;Acc:MGI:1919248]
Rrs1	20.2798	9.57288	0.472039	0.0192564	ENSMUSG00000061024	ribosome biogenesis regulator 1 [Source:MGI Symbol;Acc:MGI:1929721]
Pglyrp1	33.9708	16.034	0.471994	0.0381532	ENSMUSG00000030413	peptidoglycan recognition protein 1 [Source:MGI Symbol;Acc:MGI:1345092]
Wisp1	4.09283	1.93048	0.471673	0.0227021	ENSMUSG00000005124	WNT1 inducible signaling pathway protein 1 [Source:MGI Symbol;Acc:MGI:1197008]
Myrip	3.27557	1.5449	0.471642	0.0126838	ENSMUSG00000041794	myosin VIIA and Rab interacting protein [Source:MGI Symbol;Acc:MGI:2384407]
Rdh10	48.8552	23.0335	0.471465	0.0411006	ENSMUSG00000025921	retinol dehydrogenase 10 (all-trans) [Source:MGI Symbol;Acc:MGI:1924238]
Kcp	3.48054	1.6407	0.471393	0.0366847	ENSMUSG00000059022	kielin/chordin-like protein [Source:MGI Symbol;Acc:MGI:2141640]
Itga9	16.0672	7.56924	0.471098	0.0333992	ENSMUSG00000039115	integrin alpha 9 [Source:MGI Symbol;Acc:MGI:104756]
Prmt1	199.211	93.5384	0.469544	0.00138744	ENSMUSG00000109324	protein arginine N-methyltransferase 1 [Source:MGI Symbol;Acc:MGI:107846]
Ttyh3	35.2934	16.5272	0.468282	0.0365775	ENSMUSG00000036565	tweety family member 3 [Source:MGI Symbol;Acc:MGI:1925589]
Nipsnap1	42.5116	19.9064	0.468258	0.00320245	ENSMUSG00000034285	nipsnap homolog 1 (C. elegans) [Source:MGI Symbol;Acc:MGI:1278344]
Evpl	2.58785	1.20932	0.467307	0.0155541	ENSMUSG00000034282	envoplakin [Source:MGI Symbol;Acc:MGI:107507]
Marcksl1	109.019	50.8351	0.466294	0.0254609	ENSMUSG00000047945	MARCKS-like 1 [Source:MGI Symbol;Acc:MGI:97143]
Pmaip1	3.08865	1.4383	0.465673	0.0287622	ENSMUSG00000024521	phorbol-12-myristate-13-acetate-induced protein 1 [Source:MGI Symbol;Acc:MGI:1930146]
Myocd	7.20168	3.34788	0.464874	0.0200456	ENSMUSG00000020542	myocardin [Source:MGI Symbol;Acc:MGI:2137495]
Slc4a8	1.24158	0.577146	0.464848	0.00488724	ENSMUSG00000023032	solute carrier family 4 (anion exchanger), member 8 [Source:MGI Symbol;Acc:MGI:1928745]
Lbp	130.059	60.2909	0.463565	0.0289004	ENSMUSG00000016024	lipopolysaccharide binding protein [Source:MGI Symbol;Acc:MGI:1098776]
Mbd3	61.4914	28.4864	0.463258	0.0434701	ENSMUSG00000035478	methyl-CpG binding domain protein 3 [Source:MGI Symbol;Acc:MGI:1333812]
Eml1	90.2995	41.8073	0.462985	0.0436767	ENSMUSG00000058070	echinoderm microtubule associated protein like 1 [Source:MGI Symbol;Acc:MGI:1915769]
Jag2	9.04173	4.18244	0.462571	0.049339	ENSMUSG00000002799	jagged 2 [Source:MGI Symbol;Acc:MGI:1098270]
Myh14	4.90094	2.25763	0.460652	0.0316159	ENSMUSG00000030739	myosin, heavy polypeptide 14 [Source:MGI Symbol;Acc:MGI:1919210]
Wdr46	31.7891	14.6001	0.45928	0.0224315	ENSMUSG00000024312	WD repeat domain 46 [Source:MGI Symbol;Acc:MGI:1931871]
Wfdc1	210.941	96.8161	0.458972	0.0478771	ENSMUSG00000023336	WAP four-disulfide core domain 1 [Source:MGI Symbol;Acc:MGI:1915116]
Map2k2	56.9932	26.1185	0.458273	0.0382769	ENSMUSG00000035027	mitogen-activated protein kinase kinase 2 [Source:MGI Symbol;Acc:MGI:1346867]
Slc2a6	7.2212	3.29158	0.455822	0.0381325	ENSMUSG00000036067	solute carrier family 2 (facilitated glucose transporter), member 6 [Source:MGI Symbol;Acc:MGI:2443286]
Tinagl1	35.0722	15.9464	0.454672	0.0325801	ENSMUSG00000028776	tubulointerstitial nephritis antigen-like 1 [Source:MGI Symbol;Acc:MGI:2137617]
Letm1	27.1079	12.3191	0.454449	0.00805554	ENSMUSG00000005299	leucine zipper-EF-hand containing transmembrane protein 1 [Source:MGI Symbol;Acc:MGI:1932557]
Xpnpep1	77.346	35.1141	0.453988	0.000897005	ENSMUSG00000025027	X-prolyl aminopeptidase (aminopeptidase P) 1, soluble [Source:MGI Symbol;Acc:MGI:2180003]
Ctu2	14.1365	6.40034	0.452754	0.0105428	ENSMUSG00000049482	cytosolic thiouridylase subunit 2 [Source:MGI Symbol;Acc:MGI:1914215]
Dcxr	132.576	59.9503	0.452197	0.0147704	ENSMUSG00000039450	dicarbonyl L-xylulose reductase [Source:MGI Symbol;Acc:MGI:1915130]
Slc52a3	6.33389	2.86239	0.451917	0.0211411	ENSMUSG00000027463	solute carrier protein family 52, member 3 [Source:MGI Symbol;Acc:MGI:1916948]
Acta2	978.546	441.704	0.451388	0.0330045	ENSMUSG00000035783	actin, alpha 2, smooth muscle, aorta [Source:MGI Symbol;Acc:MGI:87909]
Aars	59.7518	26.7389	0.447499	0.0183576	ENSMUSG00000031960	alanyl-tRNA synthetase [Source:MGI Symbol;Acc:MGI:2384560]
Ciapin1	12.2261	5.47066	0.447459	0.0311816	ENSMUSG00000031781	cytokine induced apoptosis inhibitor 1 [Source:MGI Symbol;Acc:MGI:1922083]
Nes	4.6991	2.10069	0.447042	0.0172114	ENSMUSG00000004891	nestin [Source:MGI Symbol;Acc:MGI:101784]
Atf6b	44.2115	19.7445	0.446591	0.0424363	ENSMUSG00000015461	activating transcription factor 6 beta [Source:MGI Symbol;Acc:MGI:105121]
Ssx2ip	12.3573	5.51462	0.446263	0.01088	ENSMUSG00000036825	synovial sarcoma, X 2 interacting protein [Source:MGI Symbol;Acc:MGI:2139150]
1110008P14Rik	26.8048	11.9362	0.445299	0.000615132	ENSMUSG00000039195	RIKEN cDNA 1110008P14 gene [Source:MGI Symbol;Acc:MGI:1920987]
2310033P09Rik	22.147	9.84112	0.444355	0.00431942	ENSMUSG00000020441	RIKEN cDNA 2310033P09 gene [Source:MGI Symbol;Acc:MGI:1915112]
Reep6	4.46779	1.98022	0.443222	0.016939	ENSMUSG00000035504	receptor accessory protein 6 [Source:MGI Symbol;Acc:MGI:1917585]
Zbtb17	19.0711	8.43786	0.442443	0.0132467	ENSMUSG00000006215	zinc finger and BTB domain containing 17 [Source:MGI Symbol;Acc:MGI:107410]
Crocc	8.0263	3.52293	0.438923	0.0479408	ENSMUSG00000040860	ciliary rootlet coiled-coil, rootletin [Source:MGI Symbol;Acc:MGI:3529431]
Itga7	10.2217	4.48472	0.438744	0.0190138	ENSMUSG00000025348	integrin alpha 7 [Source:MGI Symbol;Acc:MGI:102700]
Sox17	61.989	27.0776	0.436813	0.0062901	ENSMUSG00000025902	SRY (sex determining region Y)-box 17 [Source:MGI Symbol;Acc:MGI:107543]
Gfra2	2.30058	1.00272	0.435854	0.0145648	ENSMUSG00000022103	glial cell line derived neurotrophic factor family receptor alpha 2 [Source:MGI Symbol;Acc:MGI:1195462]
Cpxm2	24.7714	10.7871	0.435466	0.00960687	ENSMUSG00000030862	carboxypeptidase X 2 (M14 family) [Source:MGI Symbol;Acc:MGI:1926006]
Fxyd4	124.675	54.1894	0.434645	0.0181498	ENSMUSG00000004988	FXYD domain-containing ion transport regulator 4 [Source:MGI Symbol;Acc:MGI:1889005]
Gdpd5	15.5596	6.76063	0.434498	0.00788953	ENSMUSG00000035314	glycerophosphodiester phosphodiesterase domain containing 5 [Source:MGI Symbol;Acc:MGI:2686926]
Aars2	11.1237	4.80618	0.432067	0.00935613	ENSMUSG00000023938	alanyl-tRNA synthetase 2, mitochondrial [Source:MGI Symbol;Acc:MGI:2681839]
Slc6a17	5.0616	2.18592	0.431864	0.0204911	ENSMUSG00000027894	solute carrier family 6 (neurotransmitter transporter), member 17 [Source:MGI Symbol;Acc:MGI:2442535]
Unc45b	5.07815	2.18509	0.430293	0.00779229	ENSMUSG00000018845	unc-45 myosin chaperone B [Source:MGI Symbol;Acc:MGI:2443377]
Cdo1	72.8967	31.2682	0.428938	0.00830333	ENSMUSG00000033022	cysteine dioxygenase 1, cytosolic [Source:MGI Symbol;Acc:MGI:105925]
Col6a6	8.45467	3.60375	0.426244	0.0459569	ENSMUSG00000043719	collagen, type VI, alpha 6 [Source:MGI Symbol;Acc:MGI:2444259]
Ldlr	11.0707	4.71399	0.425808	0.0375876	ENSMUSG00000032193	low density lipoprotein receptor [Source:MGI Symbol;Acc:MGI:96765]
Col5a3	13.1017	5.56895	0.425057	0.00181798	ENSMUSG00000004098	collagen, type V, alpha 3 [Source:MGI Symbol;Acc:MGI:1858212]
Paqr3	7.44933	3.16314	0.424621	0.0356311	ENSMUSG00000055725	progestin and adipoQ receptor family member III [Source:MGI Symbol;Acc:MGI:2679683]
Ppl	12.7398	5.36417	0.421056	0.0024924	ENSMUSG00000039457	periplakin [Source:MGI Symbol;Acc:MGI:1194898]
Dsp	11.1309	4.68078	0.420523	0.00208077	ENSMUSG00000054889	desmoplakin [Source:MGI Symbol;Acc:MGI:109611]
Hk2	14.7268	6.12889	0.416172	0.00932005	ENSMUSG00000000628	hexokinase 2 [Source:MGI Symbol;Acc:MGI:1315197]
P2rx6	15.5936	6.47794	0.415424	0.0183577	ENSMUSG00000022758	purinergic receptor P2X, ligand-gated ion channel, 6 [Source:MGI Symbol;Acc:MGI:1337113]
Mrgpre	1.41643	0.583035	0.411623	0.0275737	ENSMUSG00000048965	MAS-related GPR, member E [Source:MGI Symbol;Acc:MGI:2441884]
Neil1	11.1007	4.56768	0.411478	0.0125823	ENSMUSG00000032298	nei endonuclease VIII-like 1 (E. coli) [Source:MGI Symbol;Acc:MGI:1920024]
Tle2	10.9495	4.47713	0.408887	0.00271884	ENSMUSG00000034771	transducin-like enhancer of split 2 [Source:MGI Symbol;Acc:MGI:104635]
Depdc1b	2.31692	0.931066	0.401855	0.00494938	ENSMUSG00000021697	DEP domain containing 1B [Source:MGI Symbol;Acc:MGI:2145425]
Noxa1	10.9221	4.36386	0.399544	0.00713482	ENSMUSG00000036805	NADPH oxidase activator 1 [Source:MGI Symbol;Acc:MGI:2449980]
Tomm40	30.4641	12.1334	0.398287	0.021133	ENSMUSG00000002984	translocase of outer mitochondrial membrane 40 homolog (yeast) [Source:MGI Symbol;Acc:MGI:1858259]
Dact2	25.3777	10.0832	0.397327	0.000111211	ENSMUSG00000048826	dishevelled-binding antagonist of beta-catenin 2 [Source:MGI Symbol;Acc:MGI:1920347]
Scd4	3.16005	1.22847	0.388751	0.0323854	ENSMUSG00000050195	stearoyl-coenzyme A desaturase 4 [Source:MGI Symbol;Acc:MGI:2670997]
Slc15a2	23.5698	9.13621	0.387624	0.0165503	ENSMUSG00000022899	solute carrier family 15 (H+/peptide transporter), member 2 [Source:MGI Symbol;Acc:MGI:1890457]
Sel1l3	11.4906	4.45027	0.387295	0.0320953	ENSMUSG00000029189	sel-1 suppressor of lin-12-like 3 (C. elegans) [Source:MGI Symbol;Acc:MGI:1916941]
Tmem158	73.9114	28.6249	0.387287	0.0370075	ENSMUSG00000054871	transmembrane protein 158 [Source:MGI Symbol;Acc:MGI:1919559]
Sema5b	1.28606	0.492478	0.382934	0.0116267	ENSMUSG00000052133	sema domain, seven thrombospondin repeats (type 1 and type 1-like), transmembrane domain (TM) and short cytoplasmic domain, (semaphorin) 5B [Source:MGI Symbol;Acc:MGI:107555]
Cndp2	265.935	101.573	0.381948	0.031014	ENSMUSG00000024644	CNDP dipeptidase 2 (metallopeptidase M20 family) [Source:MGI Symbol;Acc:MGI:1913304]
Myrf	2.39165	0.91036	0.38064	0.00622603	ENSMUSG00000036098	myelin regulatory factor [Source:MGI Symbol;Acc:MGI:2684944]
Thbs1	68.3574	26.0129	0.380543	0.0491177	ENSMUSG00000040152	thrombospondin 1 [Source:MGI Symbol;Acc:MGI:98737]
Dusp8	2.16983	0.820386	0.378087	0.0272547	ENSMUSG00000037887	dual specificity phosphatase 8 [Source:MGI Symbol;Acc:MGI:106626]
Arhgef19	8.78266	3.31738	0.37772	0.01121	ENSMUSG00000028919	Rho guanine nucleotide exchange factor (GEF) 19 [Source:MGI Symbol;Acc:MGI:1925912]
Fam171a2	35.4395	13.27	0.374441	0.0384974	ENSMUSG00000034685	family with sequence similarity 171, member A2 [Source:MGI Symbol;Acc:MGI:2448496]
Lgr6	2.02881	0.757212	0.37323	0.00658531	ENSMUSG00000042793	leucine-rich repeat-containing G protein-coupled receptor 6 [Source:MGI Symbol;Acc:MGI:2441805]
Krt8	118.232	44.0518	0.372587	0.0310405	ENSMUSG00000049382	keratin 8 [Source:MGI Symbol;Acc:MGI:96705]
Mtss1l	19.3061	7.10261	0.367894	0.043572	ENSMUSG00000033763	metastasis suppressor 1-like [Source:MGI Symbol;Acc:MGI:3039591]
1810041L15Rik	4.76518	1.74866	0.366966	0.0380132	ENSMUSG00000062760	RIKEN cDNA 1810041L15 gene [Source:MGI Symbol;Acc:MGI:1919551]
Sort1	34.4617	12.5463	0.364064	0.00708532	ENSMUSG00000068747	sortilin 1 [Source:MGI Symbol;Acc:MGI:1338015]
Galr2	1.86808	0.676868	0.362334	0.0184314	ENSMUSG00000020793	galanin receptor 2 [Source:MGI Symbol;Acc:MGI:1337018]
Pex11a	28.3386	10.2102	0.360294	0.0285632	ENSMUSG00000030545	peroxisomal biogenesis factor 11 alpha [Source:MGI Symbol;Acc:MGI:1338788]
Asphd2	10.8652	3.89078	0.358095	0.0357126	ENSMUSG00000029348	aspartate beta-hydroxylase domain containing 2 [Source:MGI Symbol;Acc:MGI:1920148]
Cpm	5.19691	1.85508	0.356959	0.024606	ENSMUSG00000020183	carboxypeptidase M [Source:MGI Symbol;Acc:MGI:1917824]
Klhdc7a	7.75678	2.76576	0.35656	0.0165339	ENSMUSG00000078234	kelch domain containing 7A [Source:MGI Symbol;Acc:MGI:2444612]
Mt2	95.024	33.8124	0.35583	0.0159118	ENSMUSG00000031762	metallothionein 2 [Source:MGI Symbol;Acc:MGI:97172]
Jakmip1	11.4587	4.07478	0.355606	0.0115906	ENSMUSG00000063646	janus kinase and microtubule interacting protein 1 [Source:MGI Symbol;Acc:MGI:1923321]
Hgfac	4.91308	1.74628	0.355434	0.00744101	ENSMUSG00000029102	hepatocyte growth factor activator [Source:MGI Symbol;Acc:MGI:1859281]
Gpatch3	7.44389	2.62811	0.353055	0.0292402	ENSMUSG00000028850	G patch domain containing 3 [Source:MGI Symbol;Acc:MGI:2442492]
Pfkfb3	50.5585	17.8244	0.35255	0.00119926	ENSMUSG00000026773	6-phosphofructo-2-kinase/fructose-2,6-biphosphatase 3 [Source:MGI Symbol;Acc:MGI:2181202]
Fuk	18.0313	6.29011	0.348843	0.0095606	ENSMUSG00000033703	fucokinase [Source:MGI Symbol;Acc:MGI:1916071]
Wnt2	1.53981	0.531268	0.345021	0.0444047	ENSMUSG00000010797	wingless-type MMTV integration site family, member 2 [Source:MGI Symbol;Acc:MGI:98954]
Dgat2	81.6612	27.536	0.337198	5.28801e-05	ENSMUSG00000030747	diacylglycerol O-acyltransferase 2 [Source:MGI Symbol;Acc:MGI:1915050]
Slc7a5	12.3681	4.10894	0.332222	0.0169606	ENSMUSG00000040010	solute carrier family 7 (cationic amino acid transporter, y+ system), member 5 [Source:MGI Symbol;Acc:MGI:1298205]
Cacna1g	15.4372	5.11986	0.331658	7.6573e-06	ENSMUSG00000020866	calcium channel, voltage-dependent, T type, alpha 1G subunit [Source:MGI Symbol;Acc:MGI:1201678]
Atp2b2	14.8905	4.90615	0.329482	0.000864307	ENSMUSG00000030302	ATPase, Ca++ transporting, plasma membrane 2 [Source:MGI Symbol;Acc:MGI:105368]
Slc25a48	199.528	65.4689	0.328119	0.00539798	ENSMUSG00000021509	solute carrier family 25, member 48 [Source:MGI Symbol;Acc:MGI:2145373]
Irf6	65.0403	21.214	0.326167	0.0158143	ENSMUSG00000026638	interferon regulatory factor 6 [Source:MGI Symbol;Acc:MGI:1859211]
Mtx1	31.5857	10.2597	0.324823	0.0322014	ENSMUSG00000064068	metaxin 1 [Source:MGI Symbol;Acc:MGI:103025]
Elf3	43.6347	14.1623	0.324565	0.00205393	ENSMUSG00000003051	E74-like factor 3 [Source:MGI Symbol;Acc:MGI:1101781]
Atp1b1	139.52	45.0995	0.323248	0.000528823	ENSMUSG00000026576	ATPase, Na+/K+ transporting, beta 1 polypeptide [Source:MGI Symbol;Acc:MGI:88108]
Npl	150.959	48.6875	0.322521	0.0147846	ENSMUSG00000042684	N-acetylneuraminate pyruvate lyase [Source:MGI Symbol;Acc:MGI:1921341]
Gper1	8.08132	2.52397	0.312321	0.0279081	ENSMUSG00000053647	G protein-coupled estrogen receptor 1 [Source:MGI Symbol;Acc:MGI:1924104]
Gstm2	462.993	141.582	0.305798	0.00485966	ENSMUSG00000040562	glutathione S-transferase, mu 2 [Source:MGI Symbol;Acc:MGI:95861]
Hoxa7	1.49251	0.449459	0.301143	0.0410538	ENSMUSG00000038236	homeobox A7 [Source:MGI Symbol;Acc:MGI:96179]
Frmpd1	1.33952	0.402096	0.300179	0.0393139	ENSMUSG00000035615	FERM and PDZ domain containing 1 [Source:MGI Symbol;Acc:MGI:2446274]
Kctd14	21.7445	6.50008	0.29893	0.00799171	ENSMUSG00000051727	potassium channel tetramerisation domain containing 14 [Source:MGI Symbol;Acc:MGI:1289222]
Rab11fip4	2.97666	0.888259	0.298408	0.0453085	ENSMUSG00000017639	RAB11 family interacting protein 4 (class II) [Source:MGI Symbol;Acc:MGI:2442920]
Slc5a5	1.80202	0.537537	0.298297	0.00233592	ENSMUSG00000000792	solute carrier family 5 (sodium iodide symporter), member 5 [Source:MGI Symbol;Acc:MGI:2149330]
Ap3b2	25.2815	7.46228	0.295167	0.0171941	ENSMUSG00000062444	adaptor-related protein complex 3, beta 2 subunit [Source:MGI Symbol;Acc:MGI:1100869]
Lamc2	21.9444	6.46496	0.294606	0.0122685	ENSMUSG00000026479	laminin, gamma 2 [Source:MGI Symbol;Acc:MGI:99913]
Rrp12	14.263	4.1621	0.291812	0.034243	ENSMUSG00000035049	ribosomal RNA processing 12 homolog (S. cerevisiae) [Source:MGI Symbol;Acc:MGI:2147437]
Ppp1r36	2.1616	0.628703	0.29085	0.0355835	ENSMUSG00000052221	protein phosphatase 1, regulatory subunit 36 [Source:MGI Symbol;Acc:MGI:2684916]
Ano9	1.57481	0.456216	0.289696	0.031981	ENSMUSG00000054662	anoctamin 9 [Source:MGI Symbol;Acc:MGI:1918595]
Plat	140.022	40.3144	0.287914	0.0469939	ENSMUSG00000031538	plasminogen activator, tissue [Source:MGI Symbol;Acc:MGI:97610]
Tnnt2	16.4028	4.72074	0.287801	0.0429458	ENSMUSG00000026414	troponin T2, cardiac [Source:MGI Symbol;Acc:MGI:104597]
Gata2	102.726	29.4856	0.287032	0.0478755	ENSMUSG00000015053	GATA binding protein 2 [Source:MGI Symbol;Acc:MGI:95662]
Clcn5	29.9559	8.59028	0.286764	0.000190007	ENSMUSG00000004317	chloride channel, voltage-sensitive 5 [Source:MGI Symbol;Acc:MGI:99486]
Ckmt1	25.4642	7.29454	0.286463	0.00853344	ENSMUSG00000000308	creatine kinase, mitochondrial 1, ubiquitous [Source:MGI Symbol;Acc:MGI:99441]
Calb1	68.6947	19.6225	0.285647	0.0382769	ENSMUSG00000028222	calbindin 1 [Source:MGI Symbol;Acc:MGI:88248]
Acot7	330.339	92.7023	0.280628	0.034087	ENSMUSG00000028937	acyl-CoA thioesterase 7 [Source:MGI Symbol;Acc:MGI:1917275]
Plch2	2.08126	0.581214	0.279261	0.0363881	ENSMUSG00000029055	phospholipase C, eta 2 [Source:MGI Symbol;Acc:MGI:2443078]
Alg3	11.4144	3.18537	0.279065	0.012733	ENSMUSG00000033809	asparagine-linked glycosylation 3 (alpha-1,3-mannosyltransferase) [Source:MGI Symbol;Acc:MGI:1098592]
Myo3b	2.61828	0.728727	0.278323	0.0339181	ENSMUSG00000042064	myosin IIIB [Source:MGI Symbol;Acc:MGI:2448580]
Pllp	32.4893	9.02295	0.27772	0.00175899	ENSMUSG00000031775	plasma membrane proteolipid [Source:MGI Symbol;Acc:MGI:1915051]
Kif26b	6.4128	1.77339	0.276538	0.0234454	ENSMUSG00000026494	kinesin family member 26B [Source:MGI Symbol;Acc:MGI:2447076]
Rgs16	5.22859	1.42298	0.272154	0.0123552	ENSMUSG00000026475	regulator of G-protein signaling 16 [Source:MGI Symbol;Acc:MGI:108407]
Pnmal1	1.2394	0.334411	0.269816	0.00299952	ENSMUSG00000041141	PNMA-like 1 [Source:MGI Symbol;Acc:MGI:1918941]
Msx1	98.6417	26.4597	0.268241	0.0049524	ENSMUSG00000048450	msh homeobox 1 [Source:MGI Symbol;Acc:MGI:97168]
Csf3r	5.37966	1.4391	0.267507	0.0473123	ENSMUSG00000028859	colony stimulating factor 3 receptor (granulocyte) [Source:MGI Symbol;Acc:MGI:1339755]
Fgf1	8.47262	2.25901	0.266624	0.00693652	ENSMUSG00000036585	fibroblast growth factor 1 [Source:MGI Symbol;Acc:MGI:95515]
Asic4	1.50913	0.395433	0.262027	0.0237573	ENSMUSG00000033007	acid-sensing (proton-gated) ion channel family member 4 [Source:MGI Symbol;Acc:MGI:2652846]
Atp2c2	8.64878	2.26288	0.261642	0.00689149	ENSMUSG00000034112	ATPase, Ca++ transporting, type 2C, member 2 [Source:MGI Symbol;Acc:MGI:1916297]
Rbbp8nl	1.46465	0.382862	0.261402	0.0242839	ENSMUSG00000038980	RBBP8 N-terminal like [Source:MGI Symbol;Acc:MGI:3606212]
Arvcf	22.6675	5.89141	0.259906	0.000125857	ENSMUSG00000000325	armadillo repeat gene deleted in velo-cardio-facial syndrome [Source:MGI Symbol;Acc:MGI:109620]
Homer2	1.51752	0.388281	0.255866	0.00783698	ENSMUSG00000025813	homer scaffolding protein 2 [Source:MGI Symbol;Acc:MGI:1347354]
Thrsp	81.0263	20.2402	0.249798	0.00190637	ENSMUSG00000035686	thyroid hormone responsive [Source:MGI Symbol;Acc:MGI:109126]
Rassf10	2.6354	0.657635	0.249539	0.0194507	ENSMUSG00000098132	Ras association (RalGDS/AF-6) domain family (N-terminal) member 10 [Source:MGI Symbol;Acc:MGI:1925998]
Rec8	17.801	4.43268	0.249013	0.0130076	ENSMUSG00000002324	REC8 meiotic recombination protein [Source:MGI Symbol;Acc:MGI:1929645]
Kcnf1	2.52917	0.625525	0.247325	0.0349319	ENSMUSG00000051726	potassium voltage-gated channel, subfamily F, member 1 [Source:MGI Symbol;Acc:MGI:2687399]
Coro2a	45.5774	11.1651	0.24497	0.00128044	ENSMUSG00000028337	coronin, actin binding protein 2A [Source:MGI Symbol;Acc:MGI:1345966]
Galm	47.0864	11.5148	0.244547	0.00211581	ENSMUSG00000035473	galactose mutarotase [Source:MGI Symbol;Acc:MGI:2442420]
Chchd10	19.0634	4.59333	0.24095	0.0460687	ENSMUSG00000049422	coiled-coil-helix-coiled-coil-helix domain containing 10 [Source:MGI Symbol;Acc:MGI:2143558]
Mthfd2	27.332	6.47641	0.236953	0.00451925	ENSMUSG00000005667	methylenetetrahydrofolate dehydrogenase (NAD+ dependent), methenyltetrahydrofolate cyclohydrolase [Source:MGI Symbol;Acc:MGI:1338850]
Rdh9	6.19453	1.45185	0.234376	0.0101743	ENSMUSG00000056148	retinol dehydrogenase 9 [Source:MGI Symbol;Acc:MGI:2143528]
E230025N22Rik	2.01082	0.461079	0.229299	0.0217371	ENSMUSG00000044719	Riken cDNA E230025N22 gene [Source:MGI Symbol;Acc:MGI:3687212]
Akt1s1	9.53879	2.14766	0.22515	0.0267832	ENSMUSG00000011096	AKT1 substrate 1 (proline-rich) [Source:MGI Symbol;Acc:MGI:1914855]
Rdh19	1.18409	0.247843	0.209311	0.00286919	ENSMUSG00000054052	retinol dehydrogenase 19 [Source:MGI Symbol;Acc:MGI:2678390]
Lrrc10b	1.66983	0.348249	0.208553	0.0470199	ENSMUSG00000090291	leucine rich repeat containing 10B [Source:MGI Symbol;Acc:MGI:2685551]
Hoxc11	1.05702	0.219959	0.208092	0.0344363	ENSMUSG00000001656	homeobox C11 [Source:MGI Symbol;Acc:MGI:96193]
Tmprss6	3.16752	0.655238	0.206861	0.0300758	ENSMUSG00000016942	transmembrane serine protease 6 [Source:MGI Symbol;Acc:MGI:1919003]
Zbtb7c	2.53756	0.490935	0.193467	0.0495894	ENSMUSG00000044646	zinc finger and BTB domain containing 7C [Source:MGI Symbol;Acc:MGI:2443302]
Fam107a	4.59305	0.881369	0.191892	0.0104276	ENSMUSG00000021750	family with sequence similarity 107, member A [Source:MGI Symbol;Acc:MGI:3041256]
Mab21l3	83.2065	15.142	0.181981	3.0827e-05	ENSMUSG00000044313	mab-21-like 3 (C. elegans) [Source:MGI Symbol;Acc:MGI:2446273]
Ppp2r2b	13.5422	2.40326	0.177465	0.0120695	ENSMUSG00000024500	protein phosphatase 2, regulatory subunit B, beta [Source:MGI Symbol;Acc:MGI:1920180]
Pla2g5	3.75439	0.662599	0.176487	0.0222789	ENSMUSG00000041193	phospholipase A2, group V [Source:MGI Symbol;Acc:MGI:101899]
Il1b	2.67881	0.464531	0.173409	0.00238309	ENSMUSG00000027398	interleukin 1 beta [Source:MGI Symbol;Acc:MGI:96543]
Slc1a6	1.61958	0.276722	0.17086	0.00301232	ENSMUSG00000005357	solute carrier family 1 (high affinity aspartate/glutamate transporter), member 6 [Source:MGI Symbol;Acc:MGI:1096331]
Efna3	2.02187	0.332612	0.164507	0.0293022	ENSMUSG00000028039	ephrin A3 [Source:MGI Symbol;Acc:MGI:106644]
Rdh1	6.33007	1.03993	0.164283	0.00646378	ENSMUSG00000089789	retinol dehydrogenase 1 (all trans) [Source:MGI Symbol;Acc:MGI:1195275]
Kcnc4	2.7941	0.456053	0.16322	0.00197929	ENSMUSG00000027895	potassium voltage gated channel, Shaw-related subfamily, member 4 [Source:MGI Symbol;Acc:MGI:96670]
Unc5cl	5.09457	0.822375	0.161422	0.0209509	ENSMUSG00000043592	unc-5 family C-terminal like [Source:MGI Symbol;Acc:MGI:1923839]
Cbr2	274.126	39.6297	0.144568	0.0155112	ENSMUSG00000025150	carbonyl reductase 2 [Source:MGI Symbol;Acc:MGI:107200]
Bcl2l15	16.2611	2.32381	0.142906	0.00861993	ENSMUSG00000044165	BCLl2-like 15 [Source:MGI Symbol;Acc:MGI:2685412]
Bcat1	43.3882	6.16817	0.142162	0.0476218	ENSMUSG00000030268	branched chain aminotransferase 1, cytosolic [Source:MGI Symbol;Acc:MGI:104861]
Clic6	3.26368	0.457917	0.140307	0.0351919	ENSMUSG00000022949	chloride intracellular channel 6 [Source:MGI Symbol;Acc:MGI:2146607]
Ces1d	42.7493	5.90867	0.138217	0.000395976	ENSMUSG00000056973	carboxylesterase 1D [Source:MGI Symbol;Acc:MGI:2148202]
Chrdl2	6.24599	0.830477	0.132962	0.0250877	ENSMUSG00000030732	chordin-like 2 [Source:MGI Symbol;Acc:MGI:1916371]
Pga5	7.55871	0.928083	0.122783	0.0049078	ENSMUSG00000024738	pepsinogen 5, group I [Source:MGI Symbol;Acc:MGI:1915935]
Amhr2	3.06406	0.374226	0.122134	0.0304311	ENSMUSG00000023047	anti-Mullerian hormone type 2 receptor [Source:MGI Symbol;Acc:MGI:105062]
Ly6f	1.9242	0.234077	0.121649	0.00386651	ENSMUSG00000022583	lymphocyte antigen 6 complex, locus F [Source:MGI Symbol;Acc:MGI:109441]
S100a14	1.68488	0.178915	0.106189	0.00450019	ENSMUSG00000042306	S100 calcium binding protein A14 [Source:MGI Symbol;Acc:MGI:1913416]
Atp10b	4.80615	0.507446	0.105583	0.0270754	ENSMUSG00000055415	ATPase, class V, type 10B [Source:MGI Symbol;Acc:MGI:2442688]
Gcnt3	35.0671	3.39793	0.0968979	0.00963546	ENSMUSG00000032226	glucosaminyl (N-acetyl) transferase 3, mucin type [Source:MGI Symbol;Acc:MGI:1919327]
Tymp	2.08851	0.19589	0.093794	0.00932509	ENSMUSG00000022615	thymidine phosphorylase [Source:MGI Symbol;Acc:MGI:1920212]
Rdh7	1.19353	0.0934053	0.0782595	0.00742242	ENSMUSG00000040134	retinol dehydrogenase 7 [Source:MGI Symbol;Acc:MGI:1860517]
Ache	1.16107	0.090736	0.0781488	0.00582857	ENSMUSG00000023328	acetylcholinesterase [Source:MGI Symbol;Acc:MGI:87876]
Usp51	1.17746	0.0891143	0.0756837	0.00282187	ENSMUSG00000067215	ubiquitin specific protease 51 [Source:MGI Symbol;Acc:MGI:3588217]
Olah	1.63317	0.119912	0.0734229	0.00635706	ENSMUSG00000026645	oleoyl-ACP hydrolase [Source:MGI Symbol;Acc:MGI:2139018]
Cldn22	1.57222	0.0996993	0.0634131	0.000180749	ENSMUSG00000038064	claudin 22 [Source:MGI Symbol;Acc:MGI:1922927]
Fgf18	2.28486	0.136483	0.0597334	0.000772238	ENSMUSG00000057967	fibroblast growth factor 18 [Source:MGI Symbol;Acc:MGI:1277980]
Ano2	5.21103	0.272986	0.0523862	0.000474853	ENSMUSG00000038115	anoctamin 2 [Source:MGI Symbol;Acc:MGI:2387214]
Adamts16	4.36123	0.142361	0.0326423	0.00365096	ENSMUSG00000049538	a disintegrin-like and metallopeptidase (reprolysin type) with thrombospondin type 1 motif, 16 [Source:MGI Symbol;Acc:MGI:2429637]
Aldh1a7	4.38181	0.0845503	0.0192958	6.0776e-06	ENSMUSG00000024747	aldehyde dehydrogenase family 1, subfamily A7 [Source:MGI Symbol;Acc:MGI:1347050]
Fam166a	1.00315	0	0.01	0.028796	ENSMUSG00000026969	family with sequence similarity 166, member A [Source:MGI Symbol;Acc:MGI:3605773]
Entpd8	1.23837	0	0.01	0.0274016	ENSMUSG00000036813	ectonucleoside triphosphate diphosphohydrolase 8 [Source:MGI Symbol;Acc:MGI:1919340]
Crabp2	1.28844	0	0.01	0.0403059	ENSMUSG00000004885	cellular retinoic acid binding protein II [Source:MGI Symbol;Acc:MGI:88491]
Crybb1	1.93571	0	0.01	0.000249054	ENSMUSG00000029343	crystallin, beta B1 [Source:MGI Symbol;Acc:MGI:104992]
Dok1	16.5629	0.134191	0.01	0.00479553	ENSMUSG00000068335	docking protein 1 [Source:MGI Symbol;Acc:MGI:893587]
Hist1h4n	231.936	0	0.01	0.0205505	ENSMUSG00000069305	histone cluster 1, H4n [Source:MGI Symbol;Acc:MGI:4843992]
