# Supplementary material for: Identification of Gene Expression Changes Associated With Uterine Receptivity in Mice
Source: Front Physiol. 2019 Feb 14;10:125. doi: 10.3389/fphys.2019.00125 (PMC6413723; doi:10.3389/fphys.2019.00125)
Supplement: Supplementary file 3 [file Table_3.XLSX]

## Sheet: Sheet1
Supplementary Table 3. Differentially regulated genes with the potential to be reversed by fludrocortisone accorrding to CMap analysis. Amplitude, a measure of the extent of differential expression of a given probe set: amplitude=0 indicates no differential expression, amplitude >0 indicates increased expression upon treatment, and amplitude<0 indicates decreased expression upon treatment.
Symbol	amplitude	Non-receptive (averaged)	Receptive (averaged)	Fold (Receptive/Non-receptive)	P-value	Gene ID	Description
AQP8	-0.76	1.45589	14.6342	10.0517	0.0164723	ENSMUSG00000030762	aquaporin 8 [Source:MGI Symbol;Acc:MGI:1195271]
HSPB11	-0.64	13.9554	40.6716	2.91441	0.00504683	ENSMUSG00000063172	heat shock protein family B (small), member 11 [Source:MGI Symbol;Acc:MGI:1920188]
S100A4	-0.59	68.2137	196.904	2.88658	0.034471	ENSMUSG00000001020	S100 calcium binding protein A4 [Source:MGI Symbol;Acc:MGI:1330282]
CST7	-0.53	3.29196	8.84561	2.68703	0.00893733	ENSMUSG00000068129	cystatin F (leukocystatin) [Source:MGI Symbol;Acc:MGI:1298217]
ATP5S	-0.39	1.94222	5.81342	2.99318	0.0285216	ENSMUSG00000054894	ATP synthase, H+ transporting, mitochondrial F0 complex, subunit S [Source:MGI Symbol;Acc:MGI:1915305]
NDUFB2	-0.39	62.6786	130.955	2.08931	0.0328813	ENSMUSG00000002416	NADH dehydrogenase (ubiquinone) 1 beta subcomplex, 2 [Source:MGI Symbol;Acc:MGI:1915448]
S100A1	-0.38	60.9919	154.501	2.53314	0.00147916	ENSMUSG00000044080	S100 calcium binding protein A1 [Source:MGI Symbol;Acc:MGI:1338917]
ATP5E	-0.37	264.779	574.007	2.16787	0.0201926	ENSMUSG00000016252	ATP synthase, H+ transporting, mitochondrial F1 complex, epsilon subunit [Source:MGI Symbol;Acc:MGI:1855697]
KLRD1	-0.36	1.96	9.43214	4.81232	0.00452132	ENSMUSG00000030165	killer cell lectin-like receptor, subfamily D, member 1 [Source:MGI Symbol;Acc:MGI:1196275]
RPS25	-0.31	805.822	1910.44	2.3708	0.0188942	ENSMUSG00000009927	ribosomal protein S25 [Source:MGI Symbol;Acc:MGI:1922867]
GPR35	-0.31	0.872707	2.01846	2.31288	0.0068231	ENSMUSG00000026271	G protein-coupled receptor 35 [Source:MGI Symbol;Acc:MGI:1929509]
SP100	-0.3	12.1759	31.3635	2.57586	0.0054343	ENSMUSG00000026222	nuclear antigen Sp100 [Source:MGI Symbol;Acc:MGI:109561]
RDH11	-0.28	11.2873	25.1239	2.22584	0.0263842	ENSMUSG00000066441	retinol dehydrogenase 11 [Source:MGI Symbol;Acc:MGI:102581]
RPL24	-0.26	257.549	527.883	2.04964	0.0115651	ENSMUSG00000098274	ribosomal protein L24 [Source:MGI Symbol;Acc:MGI:1915443]
DLGAP5	-0.24	1.9422	4.14216	2.13272	0.0155297	ENSMUSG00000037544	discs, large (Drosophila) homolog-associated protein 5 [Source:MGI Symbol;Acc:MGI:2183453]
IER3	-0.23	25.5166	65.5507	2.56895	0.012078	ENSMUSG00000003541	immediate early response 3 [Source:MGI Symbol;Acc:MGI:104814]
RPL24	-0.23	257.549	527.883	2.04964	0.0115651	ENSMUSG00000098274	ribosomal protein L24 [Source:MGI Symbol;Acc:MGI:1915443]
RPS17	-0.22	1097.85	2321.92	2.11497	0.047315	ENSMUSG00000061787	ribosomal protein S17 [Source:MGI Symbol;Acc:MGI:1309526]
RPLP2	-0.2	840.605	1792.46	2.13235	0.00550531	ENSMUSG00000025508	ribosomal protein, large P2 [Source:MGI Symbol;Acc:MGI:1914436]
RPS7	-0.2	579.594	1201.19	2.07248	0.0386422	ENSMUSG00000061477	ribosomal protein S7 [Source:MGI Symbol;Acc:MGI:1333818]
BNIP3	-0.19	11.2483	24.0059	2.13417	0.0485099	ENSMUSG00000078566	BCL2/adenovirus E1B interacting protein 3 [Source:MGI Symbol;Acc:MGI:109326]
FMO5	-0.18	1.27554	3.13035	2.45413	0.0167138	ENSMUSG00000028088	flavin containing monooxygenase 5 [Source:MGI Symbol;Acc:MGI:1310004]
FAM13A	-0.17	3.26679	11.6874	3.57764	0.00716496	ENSMUSG00000037709	family with sequence similarity 13, member A [Source:MGI Symbol;Acc:MGI:1889842]
CYR61	-0.17	8.79859	20.2773	2.30461	0.0082839	ENSMUSG00000028195	cysteine rich protein 61 [Source:MGI Symbol;Acc:MGI:88613]
SLC39A8	-0.17	8.36498	48.9889	5.85642	0.0101237	ENSMUSG00000053897	solute carrier family 39 (metal ion transporter), member 8 [Source:MGI Symbol;Acc:MGI:1914797]
BNIP3	-0.16	11.2483	24.0059	2.13417	0.0485099	ENSMUSG00000078566	BCL2/adenovirus E1B interacting protein 3 [Source:MGI Symbol;Acc:MGI:109326]
RPL9	-0.15	1511.07	3630.01	2.40227	0.0122189	ENSMUSG00000047215	ribosomal protein L9 [Source:MGI Symbol;Acc:MGI:1298373]
CD47	-0.15	15.4948	33.1811	2.14143	0.00799986	ENSMUSG00000055447	CD47 antigen (Rh-related antigen, integrin-associated signal transducer) [Source:MGI Symbol;Acc:MGI:96617]
CHODL	-0.15	5.24485	13.7874	2.62875	0.00433578	ENSMUSG00000022860	chondrolectin [Source:MGI Symbol;Acc:MGI:2179069]
CLCA1	-0.14	5.69123	23.1898	4.07466	0.0248357	ENSMUSG00000028255	chloride channel accessory 1 [Source:MGI Symbol;Acc:MGI:1346342]
CTBS	-0.14	3.58811	10.0392	2.79791	0.0126252	ENSMUSG00000028189	chitobiase, di-N-acetyl- [Source:MGI Symbol;Acc:MGI:1921495]
LOX	-0.14	16.5779	45.1001	2.7205	0.00505552	ENSMUSG00000024529	lysyl oxidase [Source:MGI Symbol;Acc:MGI:96817]
BNIP3L	-0.13	18.2195	42.6659	2.34178	0.0380318	ENSMUSG00000022051	BCL2/adenovirus E1B interacting protein 3-like [Source:MGI Symbol;Acc:MGI:1332659]
RNASE4	-0.13	139.539	373.994	2.68021	0.00288062	ENSMUSG00000021876	ribonuclease, RNase A family 4 [Source:MGI Symbol;Acc:MGI:1926217]
HSPB11	-0.13	13.9554	40.6716	2.91441	0.00504683	ENSMUSG00000063172	heat shock protein family B (small), member 11 [Source:MGI Symbol;Acc:MGI:1920188]
AGR2	-0.12	7.99247	42.3731	5.30163	0.0277251	ENSMUSG00000020581	anterior gradient 2 [Source:MGI Symbol;Acc:MGI:1344405]
EFHC1	-0.12	1.53678	3.9488	2.56953	0.0183329	ENSMUSG00000041809	EF-hand domain (C-terminal) containing 1 [Source:MGI Symbol;Acc:MGI:1919127]
OIP5	-0.11	0.498299	2.01846	4.0507	0.0408586	ENSMUSG00000072980	Opa interacting protein 5 [Source:MGI Symbol;Acc:MGI:1917895]
RHOH	-0.09	0.413936	1.09147	2.63682	0.0374934	ENSMUSG00000029204	ras homolog family member H [Source:MGI Symbol;Acc:MGI:1921984]
CD47	-0.09	15.4948	33.1811	2.14143	0.00799986	ENSMUSG00000055447	CD47 antigen (Rh-related antigen, integrin-associated signal transducer) [Source:MGI Symbol;Acc:MGI:96617]
SSR4	-0.09	120.068	274.432	2.28564	0.00476475	ENSMUSG00000002014	signal sequence receptor, delta [Source:MGI Symbol;Acc:MGI:1099464]
DPEP1	-0.09	12.3672	35.0989	2.83807	0.00101195	ENSMUSG00000019278	dipeptidase 1 (renal) [Source:MGI Symbol;Acc:MGI:94917]
FAM13A	-0.09	3.26679	11.6874	3.57764	0.00716496	ENSMUSG00000037709	family with sequence similarity 13, member A [Source:MGI Symbol;Acc:MGI:1889842]
CD55	-0.09	16.5004	62.2988	3.77558	0.0025785	ENSMUSG00000026399	CD55 molecule, decay accelerating factor for complement [Source:MGI Symbol;Acc:MGI:104850]
TLR6	-0.07	1.03558	2.99828	2.89527	0.0166472	ENSMUSG00000051498	toll-like receptor 6 [Source:MGI Symbol;Acc:MGI:1341296]
ST8SIA4	-0.07	4.50737	14.1251	3.13379	0.00880219	ENSMUSG00000040710	ST8 alpha-N-acetyl-neuraminide alpha-2,8-sialyltransferase 4 [Source:MGI Symbol;Acc:MGI:106018]
LYPD1	-0.07	0.10648	2.17488	20.4253	0.0401464	ENSMUSG00000026344	Ly6/Plaur domain containing 1 [Source:MGI Symbol;Acc:MGI:1919835]
FXYD3	-0.07	93.3245	351.583	3.76732	0.0269825	ENSMUSG00000057092	FXYD domain-containing ion transport regulator 3 [Source:MGI Symbol;Acc:MGI:107497]
TMSB4X	-0.06	3067.21	7214.74	2.35221	0.00642754	ENSMUSG00000049775	thymosin, beta 4, X chromosome [Source:MGI Symbol;Acc:MGI:99510]
ARNT2	-0.06	4.98507	10.0011	2.0062	0.0388586	ENSMUSG00000015709	aryl hydrocarbon receptor nuclear translocator 2 [Source:MGI Symbol;Acc:MGI:107188]
ZC2HC1A	-0.05	6.06068	13.5644	2.2381	0.0226007	ENSMUSG00000043542	zinc finger, C2HC-type containing 1A [Source:MGI Symbol;Acc:MGI:1914556]
NCR1	-0.05	4.35383	17.3317	3.9808	0.0250193	ENSMUSG00000062524	natural cytotoxicity triggering receptor 1 [Source:MGI Symbol;Acc:MGI:1336212]
SPTSSA	-0.05	89.4765	185.689	2.07529	0.0247665	ENSMUSG00000044408	serine palmitoyltransferase, small subunit A [Source:MGI Symbol;Acc:MGI:1913399]
BNIP3L	-0.05	18.2195	42.6659	2.34178	0.0380318	ENSMUSG00000022051	BCL2/adenovirus E1B interacting protein 3-like [Source:MGI Symbol;Acc:MGI:1332659]
NDUFB2	-0.05	62.6786	130.955	2.08931	0.0328813	ENSMUSG00000002416	NADH dehydrogenase (ubiquinone) 1 beta subcomplex, 2 [Source:MGI Symbol;Acc:MGI:1915448]
RPS17	-0.04	1097.85	2321.92	2.11497	0.047315	ENSMUSG00000061787	ribosomal protein S17 [Source:MGI Symbol;Acc:MGI:1309526]
EEF1B2	-0.04	335.259	691.289	2.06195	0.0281881	ENSMUSG00000025967	eukaryotic translation elongation factor 1 beta 2 [Source:MGI Symbol;Acc:MGI:1929520]
RGS10	-0.03	17.9805	36.6708	2.03948	0.0129617	ENSMUSG00000030844	regulator of G-protein signalling 10 [Source:MGI Symbol;Acc:MGI:1915115]
CD47	-0.02	15.4948	33.1811	2.14143	0.00799986	ENSMUSG00000055447	CD47 antigen (Rh-related antigen, integrin-associated signal transducer) [Source:MGI Symbol;Acc:MGI:96617]
RPS17	-0.02	1097.85	2321.92	2.11497	0.047315	ENSMUSG00000061787	ribosomal protein S17 [Source:MGI Symbol;Acc:MGI:1309526]
MOG	-0.02	0.126446	1.00623	7.95778	0.0317953	ENSMUSG00000076439	myelin oligodendrocyte glycoprotein [Source:MGI Symbol;Acc:MGI:97435]
GDPD5	1.03	15.5596	6.76063	0.434498	0.00788953	ENSMUSG00000035314	glycerophosphodiester phosphodiesterase domain containing 5 [Source:MGI Symbol;Acc:MGI:2686926]
ATP2B2	0.96	14.8905	4.90615	0.329482	0.000864307	ENSMUSG00000030302	ATPase, Ca++ transporting, plasma membrane 2 [Source:MGI Symbol;Acc:MGI:105368]
THBS1	0.84	68.3574	26.0129	0.380543	0.0491177	ENSMUSG00000040152	thrombospondin 1 [Source:MGI Symbol;Acc:MGI:98737]
SSX2IP	0.74	12.3573	5.51462	0.446263	0.01088	ENSMUSG00000036825	synovial sarcoma, X 2 interacting protein [Source:MGI Symbol;Acc:MGI:2139150]
LDLR	0.74	11.0707	4.71399	0.425808	0.0375876	ENSMUSG00000032193	low density lipoprotein receptor [Source:MGI Symbol;Acc:MGI:96765]
MSX1	0.69	98.6417	26.4597	0.268241	0.0049524	ENSMUSG00000048450	msh homeobox 1 [Source:MGI Symbol;Acc:MGI:97168]
PNMAL1	0.67	1.2394	0.334411	0.269816	0.00299952	ENSMUSG00000041141	PNMA-like 1 [Source:MGI Symbol;Acc:MGI:1918941]
SORT1	0.65	34.4617	12.5463	0.364064	0.00708532	ENSMUSG00000068747	sortilin 1 [Source:MGI Symbol;Acc:MGI:1338015]
FGF18	0.65	2.28486	0.136483	0.0597334	0.000772238	ENSMUSG00000057967	fibroblast growth factor 18 [Source:MGI Symbol;Acc:MGI:1277980]
TLE3	0.63	40.3232	19.8834	0.493101	0.0446154	ENSMUSG00000032280	transducin-like enhancer of split 3 [Source:MGI Symbol;Acc:MGI:104634]
SSX2IP	0.62	12.3573	5.51462	0.446263	0.01088	ENSMUSG00000036825	synovial sarcoma, X 2 interacting protein [Source:MGI Symbol;Acc:MGI:2139150]
PPP2R2B	0.61	13.5422	2.40326	0.177465	0.0120695	ENSMUSG00000024500	protein phosphatase 2, regulatory subunit B, beta [Source:MGI Symbol;Acc:MGI:1920180]
RRP12	0.58	14.263	4.1621	0.291812	0.034243	ENSMUSG00000035049	ribosomal RNA processing 12 homolog (S. cerevisiae) [Source:MGI Symbol;Acc:MGI:2147437]
SLC15A2	0.57	23.5698	9.13621	0.387624	0.0165503	ENSMUSG00000022899	solute carrier family 15 (H+/peptide transporter), member 2 [Source:MGI Symbol;Acc:MGI:1890457]
OPTN	0.57	6.71003	3.22524	0.480659	0.0302348	ENSMUSG00000026672	optineurin [Source:MGI Symbol;Acc:MGI:1918898]
ACTA2	0.57	978.546	441.704	0.451388	0.0330045	ENSMUSG00000035783	actin, alpha 2, smooth muscle, aorta [Source:MGI Symbol;Acc:MGI:87909]
SSX2IP	0.53	12.3573	5.51462	0.446263	0.01088	ENSMUSG00000036825	synovial sarcoma, X 2 interacting protein [Source:MGI Symbol;Acc:MGI:2139150]
SEL1L3	0.52	11.4906	4.45027	0.387295	0.0320953	ENSMUSG00000029189	sel-1 suppressor of lin-12-like 3 (C. elegans) [Source:MGI Symbol;Acc:MGI:1916941]
HK2	0.52	14.7268	6.12889	0.416172	0.00932005	ENSMUSG00000000628	hexokinase 2 [Source:MGI Symbol;Acc:MGI:1315197]
SMAD7	0.51	8.82741	4.25779	0.482338	0.00837361	ENSMUSG00000025880	SMAD family member 7 [Source:MGI Symbol;Acc:MGI:1100518]
LBP	0.5	130.059	60.2909	0.463565	0.0289004	ENSMUSG00000016024	lipopolysaccharide binding protein [Source:MGI Symbol;Acc:MGI:1098776]
CDO1	0.5	72.8967	31.2682	0.428938	0.00830333	ENSMUSG00000033022	cysteine dioxygenase 1, cytosolic [Source:MGI Symbol;Acc:MGI:105925]
TLE2	0.49	10.9495	4.47713	0.408887	0.00271884	ENSMUSG00000034771	transducin-like enhancer of split 2 [Source:MGI Symbol;Acc:MGI:104635]
THBS1	0.49	68.3574	26.0129	0.380543	0.0491177	ENSMUSG00000040152	thrombospondin 1 [Source:MGI Symbol;Acc:MGI:98737]
LETM1	0.49	27.1079	12.3191	0.454449	0.00805554	ENSMUSG00000005299	leucine zipper-EF-hand containing transmembrane protein 1 [Source:MGI Symbol;Acc:MGI:1932557]
CROCC	0.47	8.0263	3.52293	0.438923	0.0479408	ENSMUSG00000040860	ciliary rootlet coiled-coil, rootletin [Source:MGI Symbol;Acc:MGI:3529431]
WWC1	0.46	25.8767	12.6633	0.489369	0.00152479	ENSMUSG00000018849	WW, C2 and coiled-coil domain containing 1 [Source:MGI Symbol;Acc:MGI:2388637]
JAG2	0.46	9.04173	4.18244	0.462571	0.049339	ENSMUSG00000002799	jagged 2 [Source:MGI Symbol;Acc:MGI:1098270]
KCNC4	0.44	2.7941	0.456053	0.16322	0.00197929	ENSMUSG00000027895	potassium voltage gated channel, Shaw-related subfamily, member 4 [Source:MGI Symbol;Acc:MGI:96670]
HK2	0.42	14.7268	6.12889	0.416172	0.00932005	ENSMUSG00000000628	hexokinase 2 [Source:MGI Symbol;Acc:MGI:1315197]
CORO2A	0.42	45.5774	11.1651	0.24497	0.00128044	ENSMUSG00000028337	coronin, actin binding protein 2A [Source:MGI Symbol;Acc:MGI:1345966]
XPNPEP1	0.41	77.346	35.1141	0.453988	0.000897005	ENSMUSG00000025027	X-prolyl aminopeptidase (aminopeptidase P) 1, soluble [Source:MGI Symbol;Acc:MGI:2180003]
TLE3	0.41	40.3232	19.8834	0.493101	0.0446154	ENSMUSG00000032280	transducin-like enhancer of split 3 [Source:MGI Symbol;Acc:MGI:104634]
THBS1	0.41	68.3574	26.0129	0.380543	0.0491177	ENSMUSG00000040152	thrombospondin 1 [Source:MGI Symbol;Acc:MGI:98737]
FGF1	0.41	8.47262	2.25901	0.266624	0.00693652	ENSMUSG00000036585	fibroblast growth factor 1 [Source:MGI Symbol;Acc:MGI:95515]
DSP	0.4	11.1309	4.68078	0.420523	0.00208077	ENSMUSG00000054889	desmoplakin [Source:MGI Symbol;Acc:MGI:109611]
CIAPIN1	0.4	12.2261	5.47066	0.447459	0.0311816	ENSMUSG00000031781	cytokine induced apoptosis inhibitor 1 [Source:MGI Symbol;Acc:MGI:1922083]
PLLP	0.39	32.4893	9.02295	0.27772	0.00175899	ENSMUSG00000031775	plasma membrane proteolipid [Source:MGI Symbol;Acc:MGI:1915051]
GCNT3	0.39	35.0671	3.39793	0.0968979	0.00963546	ENSMUSG00000032226	glucosaminyl (N-acetyl) transferase 3, mucin type [Source:MGI Symbol;Acc:MGI:1919327]
ACTA2	0.39	978.546	441.704	0.451388	0.0330045	ENSMUSG00000035783	actin, alpha 2, smooth muscle, aorta [Source:MGI Symbol;Acc:MGI:87909]
ABCA2	0.39	14.2076	6.84453	0.48175	0.0403586	ENSMUSG00000026944	ATP-binding cassette, sub-family A (ABC1), member 2 [Source:MGI Symbol;Acc:MGI:99606]
ASTN2	0.38	4.41764	2.12299	0.480571	0.0172944	ENSMUSG00000028373	astrotactin 2 [Source:MGI Symbol;Acc:MGI:1889277]
SLC7A5	0.37	12.3681	4.10894	0.332222	0.0169606	ENSMUSG00000040010	solute carrier family 7 (cationic amino acid transporter, y+ system), member 5 [Source:MGI Symbol;Acc:MGI:1298205]
FLRT1	0.37	3.01558	1.50438	0.49887	0.0497927	ENSMUSG00000047787	fibronectin leucine rich transmembrane protein 1 [Source:MGI Symbol;Acc:MGI:3026647]
MARCKSL1	0.36	109.019	50.8351	0.466294	0.0254609	ENSMUSG00000047945	MARCKS-like 1 [Source:MGI Symbol;Acc:MGI:97143]
AARS	0.36	59.7518	26.7389	0.447499	0.0183576	ENSMUSG00000031960	alanyl-tRNA synthetase [Source:MGI Symbol;Acc:MGI:2384560]
EML1	0.35	90.2995	41.8073	0.462985	0.0436767	ENSMUSG00000058070	echinoderm microtubule associated protein like 1 [Source:MGI Symbol;Acc:MGI:1915769]
PPL	0.34	12.7398	5.36417	0.421056	0.0024924	ENSMUSG00000039457	periplakin [Source:MGI Symbol;Acc:MGI:1194898]
RGS16	0.33	5.22859	1.42298	0.272154	0.0123552	ENSMUSG00000026475	regulator of G-protein signaling 16 [Source:MGI Symbol;Acc:MGI:108407]
TLE2	0.32	10.9495	4.47713	0.408887	0.00271884	ENSMUSG00000034771	transducin-like enhancer of split 2 [Source:MGI Symbol;Acc:MGI:104635]
SMOX	0.32	69.0558	33.8712	0.49049	0.0144318	ENSMUSG00000027333	spermine oxidase [Source:MGI Symbol;Acc:MGI:2445356]
IRF6	0.32	65.0403	21.214	0.326167	0.0158143	ENSMUSG00000026638	interferon regulatory factor 6 [Source:MGI Symbol;Acc:MGI:1859211]
NIPSNAP1	0.31	42.5116	19.9064	0.468258	0.00320245	ENSMUSG00000034285	nipsnap homolog 1 (C. elegans) [Source:MGI Symbol;Acc:MGI:1278344]
ELF3	0.31	43.6347	14.1623	0.324565	0.00205393	ENSMUSG00000003051	E74-like factor 3 [Source:MGI Symbol;Acc:MGI:1101781]
MAP2K2	0.3	56.9932	26.1185	0.458273	0.0382769	ENSMUSG00000035027	mitogen-activated protein kinase kinase 2 [Source:MGI Symbol;Acc:MGI:1346867]
LDLR	0.29	11.0707	4.71399	0.425808	0.0375876	ENSMUSG00000032193	low density lipoprotein receptor [Source:MGI Symbol;Acc:MGI:96765]
ILVBL	0.29	51.4829	24.9343	0.484322	0.0150228	ENSMUSG00000032763	ilvB (bacterial acetolactate synthase)-like [Source:MGI Symbol;Acc:MGI:1351911]
CROCC	0.29	8.0263	3.52293	0.438923	0.0479408	ENSMUSG00000040860	ciliary rootlet coiled-coil, rootletin [Source:MGI Symbol;Acc:MGI:3529431]
PPP2R2B	0.28	13.5422	2.40326	0.177465	0.0120695	ENSMUSG00000024500	protein phosphatase 2, regulatory subunit B, beta [Source:MGI Symbol;Acc:MGI:1920180]
MTHFD2	0.28	27.332	6.47641	0.236953	0.00451925	ENSMUSG00000005667	methylenetetrahydrofolate dehydrogenase (NAD+ dependent), methenyltetrahydrofolate cyclohydrolase [Source:MGI Symbol;Acc:MGI:1338850]
CDS2	0.28	18.3947	8.91132	0.48445	0.00865782	ENSMUSG00000058793	CDP-diacylglycerol synthase (phosphatidate cytidylyltransferase) 2 [Source:MGI Symbol;Acc:MGI:1332236]
ANO2	0.27	5.21103	0.272986	0.0523862	0.000474853	ENSMUSG00000038115	anoctamin 2 [Source:MGI Symbol;Acc:MGI:2387214]
SOX17	0.26	61.989	27.0776	0.436813	0.0062901	ENSMUSG00000025902	SRY (sex determining region Y)-box 17 [Source:MGI Symbol;Acc:MGI:107543]
NIPSNAP1	0.26	42.5116	19.9064	0.468258	0.00320245	ENSMUSG00000034285	nipsnap homolog 1 (C. elegans) [Source:MGI Symbol;Acc:MGI:1278344]
CIAPIN1	0.26	12.2261	5.47066	0.447459	0.0311816	ENSMUSG00000031781	cytokine induced apoptosis inhibitor 1 [Source:MGI Symbol;Acc:MGI:1922083]
ZBTB17	0.25	19.0711	8.43786	0.442443	0.0132467	ENSMUSG00000006215	zinc finger and BTB domain containing 17 [Source:MGI Symbol;Acc:MGI:107410]
TINAGL1	0.25	35.0722	15.9464	0.454672	0.0325801	ENSMUSG00000028776	tubulointerstitial nephritis antigen-like 1 [Source:MGI Symbol;Acc:MGI:2137617]
ITGA9	0.25	16.0672	7.56924	0.471098	0.0333992	ENSMUSG00000039115	integrin alpha 9 [Source:MGI Symbol;Acc:MGI:104756]
ALG3	0.25	11.4144	3.18537	0.279065	0.012733	ENSMUSG00000033809	asparagine-linked glycosylation 3 (alpha-1,3-mannosyltransferase) [Source:MGI Symbol;Acc:MGI:1098592]
CPM	0.24	5.19691	1.85508	0.356959	0.024606	ENSMUSG00000020183	carboxypeptidase M [Source:MGI Symbol;Acc:MGI:1917824]
TOMM40	0.23	30.4641	12.1334	0.398287	0.021133	ENSMUSG00000002984	translocase of outer mitochondrial membrane 40 homolog (yeast) [Source:MGI Symbol;Acc:MGI:1858259]
PMAIP1	0.23	3.08865	1.4383	0.465673	0.0287622	ENSMUSG00000024521	phorbol-12-myristate-13-acetate-induced protein 1 [Source:MGI Symbol;Acc:MGI:1930146]
DOK1	0.23	16.5629	0.134191	0.01	0.00479553	ENSMUSG00000068335	docking protein 1 [Source:MGI Symbol;Acc:MGI:893587]
CRABP2	0.23	1.28844	0	0.01	0.0403059	ENSMUSG00000004885	cellular retinoic acid binding protein II [Source:MGI Symbol;Acc:MGI:88491]
SLC5A5	0.22	1.80202	0.537537	0.298297	0.00233592	ENSMUSG00000000792	solute carrier family 5 (sodium iodide symporter), member 5 [Source:MGI Symbol;Acc:MGI:2149330]
MYH14	0.22	4.90094	2.25763	0.460652	0.0316159	ENSMUSG00000030739	myosin, heavy polypeptide 14 [Source:MGI Symbol;Acc:MGI:1919210]
HOXC11	0.22	1.05702	0.219959	0.208092	0.0344363	ENSMUSG00000001656	homeobox C11 [Source:MGI Symbol;Acc:MGI:96193]
CDKN1C	0.22	40.7511	20.0916	0.493031	0.0498229	ENSMUSG00000037664	cyclin-dependent kinase inhibitor 1C (P57) [Source:MGI Symbol;Acc:MGI:104564]
KCNF1	0.21	2.52917	0.625525	0.247325	0.0349319	ENSMUSG00000051726	potassium voltage-gated channel, subfamily F, member 1 [Source:MGI Symbol;Acc:MGI:2687399]
SSX2IP	0.2	12.3573	5.51462	0.446263	0.01088	ENSMUSG00000036825	synovial sarcoma, X 2 interacting protein [Source:MGI Symbol;Acc:MGI:2139150]
MTX1	0.19	31.5857	10.2597	0.324823	0.0322014	ENSMUSG00000064068	metaxin 1 [Source:MGI Symbol;Acc:MGI:103025]
WNT2	0.18	1.53981	0.531268	0.345021	0.0444047	ENSMUSG00000010797	wingless-type MMTV integration site family, member 2 [Source:MGI Symbol;Acc:MGI:98954]
TLN2	0.18	12.5103	6.16181	0.492539	0.00949637	ENSMUSG00000052698	talin 2 [Source:MGI Symbol;Acc:MGI:1917799]
THBS1	0.17	68.3574	26.0129	0.380543	0.0491177	ENSMUSG00000040152	thrombospondin 1 [Source:MGI Symbol;Acc:MGI:98737]
GATA2	0.17	102.726	29.4856	0.287032	0.0478755	ENSMUSG00000015053	GATA binding protein 2 [Source:MGI Symbol;Acc:MGI:95662]
ABCA2	0.17	14.2076	6.84453	0.48175	0.0403586	ENSMUSG00000026944	ATP-binding cassette, sub-family A (ABC1), member 2 [Source:MGI Symbol;Acc:MGI:99606]
MYRF	0.16	2.39165	0.91036	0.38064	0.00622603	ENSMUSG00000036098	myelin regulatory factor [Source:MGI Symbol;Acc:MGI:2684944]
ACOT7	0.16	330.339	92.7023	0.280628	0.034087	ENSMUSG00000028937	acyl-CoA thioesterase 7 [Source:MGI Symbol;Acc:MGI:1917275]
SLC4A8	0.15	1.24158	0.577146	0.464848	0.00488724	ENSMUSG00000023032	solute carrier family 4 (anion exchanger), member 8 [Source:MGI Symbol;Acc:MGI:1928745]
GATA2	0.15	102.726	29.4856	0.287032	0.0478755	ENSMUSG00000015053	GATA binding protein 2 [Source:MGI Symbol;Acc:MGI:95662]
AP3B2	0.15	25.2815	7.46228	0.295167	0.0171941	ENSMUSG00000062444	adaptor-related protein complex 3, beta 2 subunit [Source:MGI Symbol;Acc:MGI:1100869]
ALCAM	0.14	13.8259	6.80792	0.492404	0.00857165	ENSMUSG00000022636	activated leukocyte cell adhesion molecule [Source:MGI Symbol;Acc:MGI:1313266]
NES	0.13	4.6991	2.10069	0.447042	0.0172114	ENSMUSG00000004891	nestin [Source:MGI Symbol;Acc:MGI:101784]
MBD3	0.13	61.4914	28.4864	0.463258	0.0434701	ENSMUSG00000035478	methyl-CpG binding domain protein 3 [Source:MGI Symbol;Acc:MGI:1333812]
GSTM2	0.13	462.993	141.582	0.305798	0.00485966	ENSMUSG00000040562	glutathione S-transferase, mu 2 [Source:MGI Symbol;Acc:MGI:95861]
ATF6B	0.13	44.2115	19.7445	0.446591	0.0424363	ENSMUSG00000015461	activating transcription factor 6 beta [Source:MGI Symbol;Acc:MGI:105121]
SORT1	0.12	34.4617	12.5463	0.364064	0.00708532	ENSMUSG00000068747	sortilin 1 [Source:MGI Symbol;Acc:MGI:1338015]
S100A14	0.12	1.68488	0.178915	0.106189	0.00450019	ENSMUSG00000042306	S100 calcium binding protein A14 [Source:MGI Symbol;Acc:MGI:1913416]
CDS2	0.12	18.3947	8.91132	0.48445	0.00865782	ENSMUSG00000058793	CDP-diacylglycerol synthase (phosphatidate cytidylyltransferase) 2 [Source:MGI Symbol;Acc:MGI:1332236]
SLC15A2	0.11	23.5698	9.13621	0.387624	0.0165503	ENSMUSG00000022899	solute carrier family 15 (H+/peptide transporter), member 2 [Source:MGI Symbol;Acc:MGI:1890457]
RGS16	0.11	5.22859	1.42298	0.272154	0.0123552	ENSMUSG00000026475	regulator of G-protein signaling 16 [Source:MGI Symbol;Acc:MGI:108407]
CNDP2	0.11	265.935	101.573	0.381948	0.031014	ENSMUSG00000024644	CNDP dipeptidase 2 (metallopeptidase M20 family) [Source:MGI Symbol;Acc:MGI:1913304]
CLCN5	0.11	29.9559	8.59028	0.286764	0.000190007	ENSMUSG00000004317	chloride channel, voltage-sensitive 5 [Source:MGI Symbol;Acc:MGI:99486]
ATP2C2	0.11	8.64878	2.26288	0.261642	0.00689149	ENSMUSG00000034112	ATPase, Ca++ transporting, type 2C, member 2 [Source:MGI Symbol;Acc:MGI:1916297]
LDLR	0.09	11.0707	4.71399	0.425808	0.0375876	ENSMUSG00000032193	low density lipoprotein receptor [Source:MGI Symbol;Acc:MGI:96765]
HOMER2	0.09	1.51752	0.388281	0.255866	0.00783698	ENSMUSG00000025813	homer scaffolding protein 2 [Source:MGI Symbol;Acc:MGI:1347354]
GPATCH3	0.09	7.44389	2.62811	0.353055	0.0292402	ENSMUSG00000028850	G patch domain containing 3 [Source:MGI Symbol;Acc:MGI:2442492]
ARVCF	0.09	22.6675	5.89141	0.259906	0.000125857	ENSMUSG00000000325	armadillo repeat gene deleted in velo-cardio-facial syndrome [Source:MGI Symbol;Acc:MGI:109620]
WISP1	0.08	4.09283	1.93048	0.471673	0.0227021	ENSMUSG00000005124	WNT1 inducible signaling pathway protein 1 [Source:MGI Symbol;Acc:MGI:1197008]
SEL1L3	0.08	11.4906	4.45027	0.387295	0.0320953	ENSMUSG00000029189	sel-1 suppressor of lin-12-like 3 (C. elegans) [Source:MGI Symbol;Acc:MGI:1916941]
MBD3	0.08	61.4914	28.4864	0.463258	0.0434701	ENSMUSG00000035478	methyl-CpG binding domain protein 3 [Source:MGI Symbol;Acc:MGI:1333812]
LETM1	0.08	27.1079	12.3191	0.454449	0.00805554	ENSMUSG00000005299	leucine zipper-EF-hand containing transmembrane protein 1 [Source:MGI Symbol;Acc:MGI:1932557]
ATP10B	0.07	4.80615	0.507446	0.105583	0.0270754	ENSMUSG00000055415	ATPase, class V, type 10B [Source:MGI Symbol;Acc:MGI:2442688]
ACOT7	0.07	330.339	92.7023	0.280628	0.034087	ENSMUSG00000028937	acyl-CoA thioesterase 7 [Source:MGI Symbol;Acc:MGI:1917275]
MAD1L1	0.06	24.9811	12.2688	0.491124	0.0249252	ENSMUSG00000029554	MAD1 mitotic arrest deficient 1-like 1 [Source:MGI Symbol;Acc:MGI:1341857]
KRT8	0.06	118.232	44.0518	0.372587	0.0310405	ENSMUSG00000049382	keratin 8 [Source:MGI Symbol;Acc:MGI:96705]
JAG2	0.06	9.04173	4.18244	0.462571	0.049339	ENSMUSG00000002799	jagged 2 [Source:MGI Symbol;Acc:MGI:1098270]
CALB1	0.06	68.6947	19.6225	0.285647	0.0382769	ENSMUSG00000028222	calbindin 1 [Source:MGI Symbol;Acc:MGI:88248]
NPL	0.05	150.959	48.6875	0.322521	0.0147846	ENSMUSG00000042684	N-acetylneuraminate pyruvate lyase [Source:MGI Symbol;Acc:MGI:1921341]
ABCA7	0.05	9.86941	4.781	0.484426	0.0288293	ENSMUSG00000035722	ATP-binding cassette, sub-family A (ABC1), member 7 [Source:MGI Symbol;Acc:MGI:1351646]
AACS	0.05	15.6804	7.45364	0.475349	0.0332069	ENSMUSG00000029482	acetoacetyl-CoA synthetase [Source:MGI Symbol;Acc:MGI:1926144]
WDR46	0.04	31.7891	14.6001	0.45928	0.0224315	ENSMUSG00000024312	WD repeat domain 46 [Source:MGI Symbol;Acc:MGI:1931871]
GATA2	0.03	102.726	29.4856	0.287032	0.0478755	ENSMUSG00000015053	GATA binding protein 2 [Source:MGI Symbol;Acc:MGI:95662]
IL1B	0.02	2.67881	0.464531	0.173409	0.00238309	ENSMUSG00000027398	interleukin 1 beta [Source:MGI Symbol;Acc:MGI:96543]
EFNB2	0.02	22.7617	10.9917	0.482903	0.00725704	ENSMUSG00000001300	ephrin B2 [Source:MGI Symbol;Acc:MGI:105097]
DOK1	0.02	16.5629	0.134191	0.01	0.00479553	ENSMUSG00000068335	docking protein 1 [Source:MGI Symbol;Acc:MGI:893587]
CALB1	0.02	68.6947	19.6225	0.285647	0.0382769	ENSMUSG00000028222	calbindin 1 [Source:MGI Symbol;Acc:MGI:88248]
TNNT2	0.01	16.4028	4.72074	0.287801	0.0429458	ENSMUSG00000026414	troponin T2, cardiac [Source:MGI Symbol;Acc:MGI:104597]
