# Supplementary material for: Identification of Gene Expression Changes Associated With Uterine Receptivity in Mice
Source: Front Physiol. 2019 Feb 14;10:125. doi: 10.3389/fphys.2019.00125 (PMC6413723; doi:10.3389/fphys.2019.00125)
Supplement: Supplementary file 4 [file Table_4.XLSX]

## Sheet: Sheet1
Supplementary Table 4. The complete list of differentially expressed genes between receptive endometrium and non-receptive endometrium (fold change > 2 and P < 0.05). The Endometrium was isolated from the whole uterus by squeezing with a bent syringe needle on a glass slide.
Gene	Non-receptive (averaged)	Receptive (averaged)	Fold (Receptive/Non-receptive)	P-value	Gene ID	Description
Lrg1	12.649	22.3609	16.9085	0.000780581	ENSMUSG00000037095	leucine-rich alpha-2-glycoprotein 1 [Source:MGI Symbol;Acc:MGI:1924155]
Ctgf	43.9453	58.2487	5.63679	0.0301117	ENSMUSG00000019997	connective tissue growth factor [Source:MGI Symbol;Acc:MGI:95537]
Dgkg	2.14963	5.80272	4.98123	0.0245727	ENSMUSG00000022861	diacylglycerol kinase, gamma [Source:MGI Symbol;Acc:MGI:105060]
Gadd45a	57.1496	149.416	4.91634	0.0327026	ENSMUSG00000036390	growth arrest and DNA-damage-inducible 45 alpha [Source:MGI Symbol;Acc:MGI:107799]
Mtdh	1.5569	0.158753	4.34491	0.0155242	ENSMUSG00000022255	metadherin [Source:MGI Symbol;Acc:MGI:1914404]
Trim27	6.44455	3.62531	4.09972	0.0496472	ENSMUSG00000021326	tripartite motif-containing 27 [Source:MGI Symbol;Acc:MGI:97904]
Farp1	15.0686	11.2911	3.83717	0.0198569	ENSMUSG00000025555	FERM, RhoGEF (Arhgef) and pleckstrin domain protein 1 (chondrocyte-derived) [Source:MGI Symbol;Acc:MGI:2446173]
Osmr	5.89452	5.64179	3.79889	0.0239861	ENSMUSG00000022146	oncostatin M receptor [Source:MGI Symbol;Acc:MGI:1330819]
Il1a	1.69112	9.3171	3.44725	0.0401218	ENSMUSG00000027399	interleukin 1 alpha [Source:MGI Symbol;Acc:MGI:96542]
Aox3	69.9292	331.488	3.2246	0.0208314	ENSMUSG00000064294	aldehyde oxidase 3 [Source:MGI Symbol;Acc:MGI:1918974]
2010003K11Rik	0.668197	4.13211	3.06285	0.0234573	ENSMUSG00000042041	RIKEN cDNA 2010003K11 gene [Source:MGI Symbol;Acc:MGI:1917111]
Alox15	171.378	212.038	3.03023	0.0147838	ENSMUSG00000018924	arachidonate 15-lipoxygenase [Source:MGI Symbol;Acc:MGI:87997]
Mrpl33	21.9023	2.47828	2.9999	0.00233984	ENSMUSG00000106918	mitochondrial ribosomal protein L33 [Source:MGI Symbol;Acc:MGI:2137225]
Car4	1.39554	1.2104	2.94687	0.0165848	ENSMUSG00000000805	carbonic anhydrase 4 [Source:MGI Symbol;Acc:MGI:1096574]
Ppp1r14b	102.437	85.6356	2.92674	0.0271658	ENSMUSG00000056612	protein phosphatase 1, regulatory (inhibitor) subunit 14B [Source:MGI Symbol;Acc:MGI:107682]
Gzmc	23.2587	13.9325	2.79572	0.022004	ENSMUSG00000079186	granzyme C [Source:MGI Symbol;Acc:MGI:109256]
8430408G22Rik	1.61761	0.859335	2.77637	0.0100567	ENSMUSG00000048489	RIKEN cDNA 8430408G22 gene [Source:MGI Symbol;Acc:MGI:1918730]
Cyp2r1	1.56691	2.82781	2.75969	0.015767	ENSMUSG00000030670	cytochrome P450, family 2, subfamily r, polypeptide 1 [Source:MGI Symbol;Acc:MGI:2449771]
Hba-a1	246.262	115.271	2.66401	0.00895168	ENSMUSG00000069919	hemoglobin alpha, adult chain 1 [Source:MGI Symbol;Acc:MGI:96015]
1300017J02Rik	0.268781	1.43806	2.6621	0.015494	ENSMUSG00000033688	RIKEN cDNA 1300017J02 gene [Source:MGI Symbol;Acc:MGI:1919025]
Tnfsf8	0.884837	1.63664	2.65223	0.045888	ENSMUSG00000028362	tumor necrosis factor (ligand) superfamily, member 8 [Source:MGI Symbol;Acc:MGI:88328]
Trib3	1.19907	0.710734	2.61	0.0050876	ENSMUSG00000032715	tribbles pseudokinase 3 [Source:MGI Symbol;Acc:MGI:1345675]
Selp	2.09686	1.37072	2.53074	0.000481012	ENSMUSG00000026580	selectin, platelet [Source:MGI Symbol;Acc:MGI:98280]
Ifnar1	67.3045	283.284	2.4389	0.0482761	ENSMUSG00000022967	interferon (alpha and beta) receptor 1 [Source:MGI Symbol;Acc:MGI:107658]
Dapk2	1.15932	0.400475	2.40526	0.0353035	ENSMUSG00000032380	death-associated protein kinase 2 [Source:MGI Symbol;Acc:MGI:1341297]
Csf2rb2	1.10725	0.415396	2.32829	0.00228015	ENSMUSG00000071714	colony stimulating factor 2 receptor, beta 2, low-affinity (granulocyte-macrophage) [Source:MGI Symbol;Acc:MGI:1339760]
Cacng7	9.32771	2.30986	2.31253	0.0174822	ENSMUSG00000069806	calcium channel, voltage-dependent, gamma subunit 7 [Source:MGI Symbol;Acc:MGI:1932374]
Nudt19	83.3635	192.515	2.29498	0.00676596	ENSMUSG00000034875	nudix (nucleoside diphosphate linked moiety X)-type motif 19 [Source:MGI Symbol;Acc:MGI:94203]
Slc26a6	19.6455	90.2667	2.28721	0.0156082	ENSMUSG00000023259	solute carrier family 26, member 6 [Source:MGI Symbol;Acc:MGI:2159728]
Procr	5.48954	1.72799	2.27411	0.000426721	ENSMUSG00000027611	protein C receptor, endothelial [Source:MGI Symbol;Acc:MGI:104596]
Slc1a1	4.76288	0.763214	2.25616	0.0444261	ENSMUSG00000024935	solute carrier family 1 (neuronal/epithelial high affinity glutamate transporter, system Xag), member 1 [Source:MGI Symbol;Acc:MGI:105083]
Kras	18.1012	46.3786	2.25455	0.0488745	ENSMUSG00000030265	Kirsten rat sarcoma viral oncogene homolog [Source:MGI Symbol;Acc:MGI:96680]
Plvap	5.85603	1.44386	2.23002	0.00207798	ENSMUSG00000034845	plasmalemma vesicle associated protein [Source:MGI Symbol;Acc:MGI:1890497]
Rps6ka4	75.0051	164.009	2.20604	0.0186639	ENSMUSG00000024952	ribosomal protein S6 kinase, polypeptide 4 [Source:MGI Symbol;Acc:MGI:1930076]
Thumpd2	45.4541	403.008	2.15382	0.00369051	ENSMUSG00000024246	THUMP domain containing 2 [Source:MGI Symbol;Acc:MGI:1919417]
Rai2	24.0719	103.631	2.1512	0.0167493	ENSMUSG00000043518	retinoic acid induced 2 [Source:MGI Symbol;Acc:MGI:1344378]
Akap9	54.4372	234.68	2.14431	0.030585	ENSMUSG00000040407	A kinase (PRKA) anchor protein (yotiao) 9 [Source:MGI Symbol;Acc:MGI:2178217]
Gpr1	0.688715	1.11268	2.14043	0.0416024	ENSMUSG00000046856	G protein-coupled receptor 1 [Source:MGI Symbol;Acc:MGI:2385324]
Cyp26a1	28.2124	205.004	2.13933	0.020479	ENSMUSG00000024987	cytochrome P450, family 26, subfamily a, polypeptide 1 [Source:MGI Symbol;Acc:MGI:1096359]
Tmco4	3.32944	2.25155	2.13635	0.00747673	ENSMUSG00000041143	transmembrane and coiled-coil domains 4 [Source:MGI Symbol;Acc:MGI:1924306]
9330159F19Rik	1.61947	3.53517	2.09004	0.044712	ENSMUSG00000004360	RIKEN cDNA 9330159F19 gene [Source:MGI Symbol;Acc:MGI:3036239]
Il31ra	4.23708	24.8663	2.08393	0.0184476	ENSMUSG00000050377	interleukin 31 receptor A [Source:MGI Symbol;Acc:MGI:2180511]
Bphl	191.978	1368.26	2.07521	0.0228901	ENSMUSG00000038286	biphenyl hydrolase-like (serine hydrolase, breast epithelial mucin-associated antigen) [Source:MGI Symbol;Acc:MGI:1915271]
Negr1	31.5438	199.54	2.06679	0.0244012	ENSMUSG00000040037	neuronal growth regulator 1 [Source:MGI Symbol;Acc:MGI:2444846]
Khk	191.197	666.808	2.05805	0.00103853	ENSMUSG00000029162	ketohexokinase [Source:MGI Symbol;Acc:MGI:1096353]
Ankrd29	24.4169	85.9189	2.04652	0.0150677	ENSMUSG00000057766	ankyrin repeat domain 29 [Source:MGI Symbol;Acc:MGI:2687055]
Tyms	5.35324	2.28654	2.01871	0.00882387	ENSMUSG00000025747	thymidylate synthase [Source:MGI Symbol;Acc:MGI:98878]
Lig4	8.53437	22.0152	0.499974	0.00554703	ENSMUSG00000049717	ligase IV, DNA, ATP-dependent [Source:MGI Symbol;Acc:MGI:1335098]
Galm	33.2636	23.4987	0.499061	0.0192625	ENSMUSG00000035473	galactose mutarotase [Source:MGI Symbol;Acc:MGI:2442420]
Zwilch	1.65364	0.961768	0.496681	0.00478223	ENSMUSG00000032400	zwilch kinetochore protein [Source:MGI Symbol;Acc:MGI:1915264]
Insm2	0.416376	1.03749	0.493111	0.0425611	ENSMUSG00000045440	insulinoma-associated 2 [Source:MGI Symbol;Acc:MGI:1930787]
Ntrk2	22.3774	40.5314	0.486573	0.00462652	ENSMUSG00000055254	neurotrophic tyrosine kinase, receptor, type 2 [Source:MGI Symbol;Acc:MGI:97384]
0610040J01Rik	9.70107	8.14854	0.482661	0.0427934	ENSMUSG00000060512	RIKEN cDNA 0610040J01 gene [Source:MGI Symbol;Acc:MGI:1923511]
Lrrc8e	4.7878	7.99944	0.482067	0.0421283	ENSMUSG00000046589	leucine rich repeat containing 8 family, member E [Source:MGI Symbol;Acc:MGI:1919517]
Gpd2	1.4424	0.412454	0.475793	0.0232204	ENSMUSG00000026827	glycerol phosphate dehydrogenase 2, mitochondrial [Source:MGI Symbol;Acc:MGI:99778]
Ppp1r14a	25.9529	4.49543	0.474843	0.0441643	ENSMUSG00000037166	protein phosphatase 1, regulatory (inhibitor) subunit 14A [Source:MGI Symbol;Acc:MGI:1931139]
Stc2	84.2619	761.216	0.465816	0.032678	ENSMUSG00000020303	stanniocalcin 2 [Source:MGI Symbol;Acc:MGI:1316731]
Gfpt1	52.3661	149.966	0.463931	0.0118611	ENSMUSG00000029992	glutamine fructose-6-phosphate transaminase 1 [Source:MGI Symbol;Acc:MGI:95698]
Capsl	2.13453	1.18551	0.457814	0.0423786	ENSMUSG00000039676	calcyphosine-like [Source:MGI Symbol;Acc:MGI:1922818]
Slc9a9	10.2425	15.3956	0.451467	0.029148	ENSMUSG00000031129	solute carrier family 9 (sodium/hydrogen exchanger), member 9 [Source:MGI Symbol;Acc:MGI:2679732]
Yars2	7.84089	4.19922	0.441316	0.0153665	ENSMUSG00000022792	tyrosyl-tRNA synthetase 2 (mitochondrial) [Source:MGI Symbol;Acc:MGI:1917370]
Fndc1	40.06	326.418	0.439973	0.0395591	ENSMUSG00000071984	fibronectin type III domain containing 1 [Source:MGI Symbol;Acc:MGI:1915905]
Zfp566	4.48065	4.07885	0.436788	0.014675	ENSMUSG00000078768	zinc finger protein 566 [Source:MGI Symbol;Acc:MGI:1919806]
Nup107	1.54547	0.174209	0.418726	0.0443098	ENSMUSG00000052798	nucleoporin 107 [Source:MGI Symbol;Acc:MGI:2143854]
Sftpd	8.43709	5.10576	0.416964	0.0368183	ENSMUSG00000021795	surfactant associated protein D [Source:MGI Symbol;Acc:MGI:109515]
Pnliprp2	2.02925	10.7444	0.416084	0.0274235	ENSMUSG00000025091	pancreatic lipase-related protein 2 [Source:MGI Symbol;Acc:MGI:1336202]
Rxra	1.07507	0.19771	0.409748	0.0124459	ENSMUSG00000015846	retinoid X receptor alpha [Source:MGI Symbol;Acc:MGI:98214]
Ly6d	21.0511	128.105	0.396602	0.0282902	ENSMUSG00000034634	lymphocyte antigen 6 complex, locus D [Source:MGI Symbol;Acc:MGI:96881]
Sh3tc2	20.573	76.6883	0.38998	0.0482933	ENSMUSG00000045629	SH3 domain and tetratricopeptide repeats 2 [Source:MGI Symbol;Acc:MGI:2444417]
Dock2	14.1508	22.7588	0.388566	0.0206251	ENSMUSG00000020143	dedicator of cyto-kinesis 2 [Source:MGI Symbol;Acc:MGI:2149010]
Slc18a3	1.6542	12.1334	0.376841	0.0434372	ENSMUSG00000100241	solute carrier family 18 (vesicular monoamine), member 3 [Source:MGI Symbol;Acc:MGI:1101061]
Pi4k2a	16.9179	13.898	0.355871	0.0188625	ENSMUSG00000025178	phosphatidylinositol 4-kinase type 2 alpha [Source:MGI Symbol;Acc:MGI:1934031]
Gcat	23.0565	41.8472	0.354608	0.0446238	ENSMUSG00000006378	glycine C-acetyltransferase (2-amino-3-ketobutyrate-coenzyme A ligase) [Source:MGI Symbol;Acc:MGI:1349389]
Blnk	1.23454	0.147742	0.325556	0.0373579	ENSMUSG00000061132	B cell linker [Source:MGI Symbol;Acc:MGI:96878]
Akr1c13	3.20465	2.1297	0.31243	0.0476309	ENSMUSG00000021213	aldo-keto reductase family 1, member C13 [Source:MGI Symbol;Acc:MGI:1351662]
Cldn1	6.40698	3.05151	0.312018	0.0065035	ENSMUSG00000022512	claudin 1 [Source:MGI Symbol;Acc:MGI:1276109]
Brsk1	2.5862	0.580146	0.311282	0.0461638	ENSMUSG00000035390	BR serine/threonine kinase 1 [Source:MGI Symbol;Acc:MGI:2685946]
Tmem45b	51.7768	115.949	0.295751	0.00201441	ENSMUSG00000041737	transmembrane protein 45b [Source:MGI Symbol;Acc:MGI:2384574]
Galc	4.04499	2.0567	0.278622	0.0277823	ENSMUSG00000021003	galactosylceramidase [Source:MGI Symbol;Acc:MGI:95636]
Rpusd3	1.14804	0.163234	0.271467	0.0185507	ENSMUSG00000051169	RNA pseudouridylate synthase domain containing 3 [Source:MGI Symbol;Acc:MGI:2141440]
Lcn2	23.4802	37.1073	0.244716	0.0180235	ENSMUSG00000026822	lipocalin 2 [Source:MGI Symbol;Acc:MGI:96757]
Glrb	2.59103	0.914951	0.231417	0.0395557	ENSMUSG00000028020	glycine receptor, beta subunit [Source:MGI Symbol;Acc:MGI:95751]
Chst12	6.42765	3.05903	0.218208	0.0426622	ENSMUSG00000036599	carbohydrate sulfotransferase 12 [Source:MGI Symbol;Acc:MGI:1929064]
Cdk5	95.5002	308.965	0.215165	0.013483	ENSMUSG00000028969	cyclin-dependent kinase 5 [Source:MGI Symbol;Acc:MGI:101765]
Gstm7	50.0773	7.62416	0.214013	0.0172389	ENSMUSG00000004035	glutathione S-transferase, mu 7 [Source:MGI Symbol;Acc:MGI:1915562]
Trib1	28.3241	106.385	0.209313	0.0156631	ENSMUSG00000032501	tribbles pseudokinase 1 [Source:MGI Symbol;Acc:MGI:2443397]
Lamc2	31.4387	45.0406	0.157694	0.0191919	ENSMUSG00000026479	laminin, gamma 2 [Source:MGI Symbol;Acc:MGI:99913]
Ltf	80.2011	23.8486	0.140624	0.0139605	ENSMUSG00000032496	lactotransferrin [Source:MGI Symbol;Acc:MGI:96837]
Egfl6	7.20172	10.2498	0.0716807	0.0391306	ENSMUSG00000000402	EGF-like-domain, multiple 6 [Source:MGI Symbol;Acc:MGI:1858599]
Mfap4	122.699	47.0069	0.0513251	0.000639889	ENSMUSG00000042436	microfibrillar-associated protein 4 [Source:MGI Symbol;Acc:MGI:1342276]
Prap1	15.3909	2.8866	0.0223624	0.0160873	ENSMUSG00000025467	proline-rich acidic protein 1 [Source:MGI Symbol;Acc:MGI:893573]
